# Supplementary material for: Measuring local depletion of terrestrial game vertebrates by central-place hunters in rural Amazonia
Source: PLoS One. 2017 Oct 17;12(10):e0186653. doi: 10.1371/journal.pone.0186653 (PMC5645145; doi:10.1371/journal.pone.0186653)
Supplement: S3 File — (XLSX) [file pone.0186653.s003.xlsx]

## Sheet: data
camera_code	Atel.mi	Cryp.sp	Cuni.pa	Dasy.sp	Dide.ma	Echi.sp	Eira.ba	Leop.pa	Leop.wi	Lept.sp	Maza.am	Maza.ne	Meta.sp	Mitu.Cr	Myop.sp	Myrm.tr	Nasu.na	Nons.Ci	Odon.sp	Orta.gu	Pant.on	Peca.ta	Pene.ja	Prio.ma	Proc.ca	Psop.sp	Puma.co	Puma.ya	Sciu.ig	Sciu.sp	Tama.te	Tapi.te	Taya.pe	Tina.sp	all.dets	Bin.hunt	Bin.pers	Bin.huntpers	Bin.unpers	All	Bin.hunt.nq	Bin.huntpers.nq	All.nq	Hw	Hw.nq	days_deployed_rounded	community_code_cameras	study_region_code	distance_to_community_m
1	0	0	1	0	0	0	0	0	0	0	0	0	0	0	0	1	0	1	0	0	0	1	0	0	0	0	0	0	0	0	0	0	0	0	4	137950	0	137950	37538.5	175488	137950	137950	175488	384631	384631	30	7	1	3351.19
2	0	0	6	3	0	0	0	0	0	0	0	0	0	0	1	0	0	1	0	0	0	0	1	0	0	0	0	0	0	0	0	0	0	0	12	84749.8	0	84749.8	784.884	85534.7	84749.8	84749.8	85534.7	223640	223640	30	7	1	3965.76
3	0	0	0	0	0	1	0	0	0	0	0	1	0	0	0	0	0	0	0	0	0	0	0	0	0	0	0	0	0	0	0	1	0	0	3	213750	0	213750	560	214310	213750	213750	214310	385524	385524	30	7	1	5952.86
4	0	0	2	0	0	0	1	0	0	0	0	3	0	1	0	0	0	0	0	0	0	0	0	0	0	0	0	0	0	0	0	0	0	0	7	89141.1	6402	95543.1	0	95543.1	89141.1	95543.1	95543.1	169231	169231	30	7	1	8661.14
5	0	0	0	6	0	0	0	0	0	0	0	0	0	0	1	0	0	0	0	0	0	1	0	0	0	0	0	0	0	0	0	0	0	0	8	156453	0	156453	784.884	157238	156453	156453	157238	429340	429340	30	7	1	12781.2
6	0	0	0	4	0	0	0	0	0	0	0	1	0	0	3	0	0	0	0	0	0	2	0	0	0	0	0	0	0	2	0	0	0	0	12	290719	0	290719	5717.81	296437	290719	290719	296437	783328	783328	30	7	1	12484.8
7	0	0	1	2	0	0	0	0	0	0	0	1	0	0	0	0	0	0	0	0	0	0	0	0	0	0	0	0	0	0	0	0	0	0	4	42234.4	0	42234.4	0	42234.4	42234.4	42234.4	42234.4	89659.6	89659.6	30	7	1	11840.2
8	0	0	1	1	1	0	1	0	0	0	0	0	0	0	0	0	0	0	0	0	0	0	0	0	0	0	0	0	0	0	0	7	0	0	11	1.35899e+06	7489.5	1.36648e+06	0	1.36648e+06	1.35899e+06	1.36648e+06	1.36648e+06	2.50533e+06	2.50533e+06	30	7	1	10054.6
9	0	0	0	5	1	0	0	0	0	0	0	2	0	0	0	0	0	0	0	0	0	0	0	0	0	0	0	0	0	0	0	0	0	0	8	70961	1087.5	72048.5	0	72048.5	70961	72048.5	72048.5	135483	135483	30	7	1	8958.03
10	0	0	0	0	0	0	0	2	0	0	4	1	0	1	4	1	0	0	0	0	0	2	0	0	0	2	0	0	0	0	0	0	0	0	17	406544	40000	446544	54539.7	501084	406544	446544	501084	1.01858e+06	1.01858e+06	30	8	1	1557.64
11	0	0	0	0	0	0	1	0	0	0	0	0	0	0	0	0	0	0	0	0	0	0	0	0	0	0	0	0	0	0	0	0	0	0	1	0	6402	6402	0	6402	0	6402	6402	0	0	30	8	1	1856.19
12	1	0	0	1	0	0	0	0	0	0	0	0	0	0	0	0	0	0	0	0	0	0	0	0	0	0	0	0	0	0	0	0	0	0	2	5492.2	0	5492.2	9300	14792.2	5492.2	5492.2	14792.2	13628	13628	30	8	1	2501.69
13	1	0	1	0	0	0	0	0	0	0	0	0	0	0	1	0	0	2	0	0	0	0	0	1	0	0	0	0	0	0	0	0	0	0	6	19400	0	19400	40084.9	59484.9	19400	19400	59484.9	45384.4	45384.4	30	8	1	4475.48
14	0	0	0	0	0	0	0	0	0	0	0	0	0	0	0	0	0	0	0	0	0	0	0	1	0	0	0	0	0	0	0	0	0	0	1	0	0	0	30000	30000	0	0	30000	0	0	30	8	1	7414.3
15	0	0	0	4	0	0	0	0	0	0	0	0	0	0	0	0	0	0	0	0	0	0	0	0	0	0	0	0	0	0	0	0	0	0	4	21968.8	0	21968.8	0	21968.8	21968.8	21968.8	21968.8	54511.8	54511.8	30	8	1	2777.67
16	0	0	0	11	0	0	0	0	0	0	0	1	0	0	0	0	0	0	0	0	0	0	0	0	1	0	0	0	0	0	0	0	0	0	13	82164.3	0	82164.3	5400	87564.3	82164.3	82164.3	87564.3	183579	183579	30	8	1	3076.8
17	0	0	0	1	0	0	0	0	0	0	0	0	0	0	0	0	0	0	0	0	0	0	0	0	0	0	0	0	0	0	0	0	0	0	1	5492.2	0	5492.2	0	5492.2	5492.2	5492.2	5492.2	13628	13628	30	8	1	3571.22
18	0	0	0	0	0	0	1	0	0	0	2	1	0	0	0	0	0	0	0	0	0	0	0	0	0	0	0	0	0	1	0	0	0	0	5	88201.6	6402	94603.6	1681.58	96285.2	88201.6	94603.6	96285.2	173175	173175	30	8	1	5567.92
19	1	0	0	2	0	0	0	0	1	0	1	1	0	0	0	0	0	0	0	0	0	2	0	0	0	2	0	0	0	0	0	1	0	0	11	504960	6000	510960	23161.7	534122	504960	510960	534122	1.17768e+06	1.17768e+06	30	8	1	8549.63
20	0	0	0	3	0	1	0	1	0	1	4	0	0	0	1	0	0	2	1	0	0	0	1	2	0	0	0	0	0	2	0	1	0	1	21	359204	20000	379204	66571.4	445775	359204	379204	445775	692911	692911	31	38	1	7892.74
21	0	0	2	28	0	0	0	1	0	0	2	5	0	0	0	0	0	8	0	0	0	1	0	0	0	1	0	0	0	0	0	0	0	0	48	511083	20000	531083	6930.84	538014	511083	531083	538014	1.16109e+06	1.16109e+06	31	38	1	8092.43
22	0	0	2	5	0	0	1	0	0	0	0	3	0	0	0	0	0	0	0	0	0	2	0	0	0	0	0	0	0	0	0	0	0	0	13	358711	6402	365113	0	365113	358711	365113	365113	921764	921764	31	38	1	8392.92
23	0	0	0	5	0	0	0	1	0	0	0	0	0	1	0	0	0	0	0	0	0	2	0	0	0	0	0	0	0	1	0	0	0	0	10	279352	20000	299352	1681.58	301034	279352	299352	301034	774037	774037	31	38	1	9694.06
24	0	0	0	4	0	0	0	0	0	0	1	0	0	0	0	0	0	2	0	0	2	0	0	0	0	0	0	0	0	0	0	0	0	0	9	63704.8	220000	283705	0	283705	63704.8	283705	283705	136546	136546	31	52	1	1434.95
25	0	0	5	10	3	0	0	1	0	0	0	0	0	1	0	0	0	3	0	0	0	0	0	1	0	2	0	0	0	0	0	0	0	0	26	122163	23262.5	145426	43861.7	189287	122163	145426	189287	315671	315671	31	52	1	1657.01
26	0	0	2	2	0	3	1	2	0	0	2	2	0	0	0	0	0	1	0	0	0	1	0	0	0	13	0	0	0	0	0	0	0	0	29	268386	46402	314788	91780.9	406569	268386	314788	406569	647466	647466	31	52	1	2271.32
27	0	0	2	2	0	0	2	0	0	0	1	0	0	1	0	0	0	0	0	0	1	0	0	0	0	0	0	0	0	3	0	0	0	0	12	68101.3	122804	190905	5044.74	195950	68101.3	190905	195950	165224	165224	31	52	1	3557.9
28	0	0	2	17	0	0	0	0	0	0	5	0	0	11	0	0	0	0	0	0	0	1	0	1	0	0	0	0	0	0	0	0	0	0	37	455798	0	455798	30000	485798	455798	455798	485798	1.10374e+06	1.10374e+06	31	52	1	3733.15
29	0	0	0	1	0	0	0	0	0	0	1	0	0	0	0	1	0	0	0	0	1	0	0	0	0	2	0	0	0	0	0	0	0	0	6	38718	110000	148718	51400.1	200118	38718	148718	200118	83379.9	83379.9	30	42	1	9232.81
30	0	0	3	1	0	0	0	0	0	0	0	0	0	2	0	0	0	2	0	0	0	0	0	0	0	2	0	0	0	0	0	0	0	0	10	53674.3	0	53674.3	13861.7	67536	53674.3	53674.3	67536	137980	137980	30	42	1	9463.1
31	0	0	2	0	0	0	0	0	0	0	1	1	0	0	0	0	0	2	0	0	0	1	0	0	0	0	0	0	0	0	0	0	0	0	7	207376	0	207376	0	207376	207376	207376	207376	525113	525113	30	42	1	9894.85
32	0	1	0	3	0	1	0	0	0	0	0	0	0	0	1	0	0	0	0	0	0	1	0	0	0	0	0	0	0	0	0	0	0	0	7	140562	0	140562	1344.88	141907	140562	140562	141907	389040	389040	30	42	1	11461.3
33	0	0	1	0	0	1	1	0	0	0	0	2	0	0	0	0	0	0	0	0	0	1	1	0	0	0	0	0	0	0	0	3	0	1	11	760424	6402	766826	560	767386	760424	766826	767386	1.50372e+06	1.50372e+06	30	42	1	13555
34	0	0	2	1	0	0	0	2	0	0	0	0	0	0	0	0	0	1	0	0	0	0	0	0	0	1	0	1	0	0	0	0	0	0	8	29442.2	48000	77442.2	6930.84	84373	29442.2	77442.2	84373	79418.6	79418.6	31	15	1	7432.74
35	0	0	3	8	0	0	0	1	0	0	0	0	0	0	0	0	0	2	0	0	0	0	0	0	0	0	0	0	0	0	0	1	0	0	15	274338	20000	294338	0	294338	274338	294338	294338	563725	563725	31	15	1	7717.01
36	0	0	0	0	0	0	1	0	0	0	0	0	0	1	1	0	0	2	0	0	0	0	0	0	0	0	0	0	0	0	0	0	0	0	5	14791.1	6402	21193.1	784.884	21977.9	14791.1	21193.1	21977.9	27403.8	27403.8	31	15	1	8496.62
37	0	0	5	0	0	0	0	0	1	0	0	3	0	1	1	0	0	2	0	0	0	2	0	0	0	0	0	0	0	0	0	0	0	0	15	374541	6000	380541	784.884	381326	374541	380541	381326	967225	967225	31	15	1	10338.6
38	0	0	1	0	0	0	2	1	0	0	2	0	1	0	0	0	0	0	0	0	0	0	0	0	0	2	0	0	0	0	1	0	0	0	10	75951.6	32804	108756	21181.3	129937	75951.6	108756	129937	168236	168236	31	21	1	1280.75
39	0	0	0	0	1	2	0	0	0	0	0	1	0	0	0	0	0	0	0	0	0	0	0	0	0	0	0	0	0	0	0	0	0	0	4	21750	1087.5	22837.5	1120	23957.5	21750	22837.5	23957.5	33671.4	33671.4	20	21	1	1537.22
40	0	0	0	3	0	0	0	0	0	0	0	0	0	0	0	2	0	1	0	0	0	0	0	0	0	0	0	0	0	0	0	0	0	0	6	21426.6	0	21426.6	75076.9	96503.5	21426.6	21426.6	96503.5	49209.9	49209.9	30	21	1	2193.05
41	0	0	1	3	0	0	0	0	0	0	0	1	0	0	0	0	0	0	0	0	0	0	0	0	0	1	0	0	0	0	0	0	0	0	6	47726.6	0	47726.6	6930.84	54657.5	47726.6	47726.6	54657.5	103288	103288	23	43	1	3395.77
42	0	0	0	3	0	0	0	1	0	0	0	1	0	0	0	0	0	1	0	0	0	0	0	0	0	1	0	0	0	0	0	0	0	0	7	43176.6	20000	63176.6	6930.84	70107.5	43176.6	63176.6	70107.5	82881.4	82881.4	29	43	1	7015.49
43	0	0	0	2	0	1	0	0	0	0	0	0	0	0	0	0	0	0	0	0	0	0	0	0	0	1	0	0	0	0	0	0	0	0	4	10984.4	0	10984.4	7490.84	18475.3	10984.4	10984.4	18475.3	27255.9	27255.9	30	37	1	2129.63
44	0	0	0	2	1	1	0	0	0	0	0	5	0	0	0	1	1	1	0	0	0	0	0	1	0	1	0	0	0	0	0	0	1	0	15	2.31092e+06	1087.5	2.31201e+06	135464	2.44748e+06	124684	125772	261236	6.22346e+06	203939	33	37	1	2262.64
45	0	1	1	17	0	0	0	2	0	0	0	0	0	0	4	3	0	3	0	0	0	2	1	0	0	11	0	0	0	1	0	1	0	0	47	563626	40000	603626	193676	797302	563626	603626	797302	1.335e+06	1.335e+06	40	43	1	2279.75
46	0	0	0	4	0	0	2	0	0	0	0	1	0	0	3	0	0	0	0	0	0	1	0	0	0	0	0	0	0	0	0	0	0	0	11	167219	12804	180023	2354.65	182377	167219	180023	182377	435756	435756	30	43	1	3795.26
47	0	0	0	3	3	1	0	0	0	0	1	0	1	1	0	0	0	0	0	0	0	0	1	0	0	0	0	1	0	0	0	0	0	1	13	61127.6	11262.5	72390.1	950	73340.1	61127.6	72390.1	73340.1	121533	121533	30	48	1	5226.18
48	0	0	1	3	0	5	0	0	0	0	2	0	0	0	0	1	0	0	0	0	0	0	0	0	0	0	0	0	0	0	0	0	0	0	12	92428.2	0	92428.2	40338.5	132767	92428.2	92428.2	132767	209120	209120	30	48	1	5275.53
49	0	0	3	3	1	1	0	0	0	0	0	0	0	1	1	1	1	0	0	0	0	2	0	0	0	2	0	0	0	0	0	0	0	0	16	296868	1087.5	297955	113180	411135	296868	297955	411135	832978	832978	30	48	1	5203.29
50	3	1	0	4	0	0	0	0	0	0	0	0	0	0	0	0	0	0	0	0	1	0	0	0	0	0	0	0	0	1	0	0	0	0	10	22554	110000	132554	29581.6	162136	22554	132554	162136	55095.5	55095.5	14	48	1	5604.64
51	0	0	4	25	0	0	0	0	0	0	1	3	2	1	0	0	0	0	0	0	0	1	0	0	0	5	0	0	0	4	0	2	0	0	48	786172	0	786172	42160.5	828333	786172	786172	828333	1.68842e+06	1.68842e+06	30	48	1	8061.81
52	1	0	2	3	1	0	0	0	0	0	1	0	0	0	0	0	0	1	0	0	0	0	0	0	0	0	0	0	0	0	0	0	0	0	9	73652.4	1087.5	74739.9	9300	84039.9	73652.4	74739.9	84039.9	176426	176426	30	48	1	2617.58
53	0	0	10	11	0	0	0	1	0	0	1	0	1	0	0	0	0	1	0	0	0	0	0	0	0	0	0	0	0	0	0	1	0	0	26	385590	20000	405590	390	405980	385590	405590	405980	867161	867161	30	48	1	2795.9
54	0	0	2	4	1	1	5	0	0	1	1	1	0	0	0	0	0	1	0	0	0	0	0	0	0	0	0	0	0	0	0	0	0	1	18	102495	33097.5	135593	746.25	136339	102495	135593	136339	226204	226204	30	48	1	3197.95
55	0	0	4	4	0	0	3	0	0	0	1	1	5	0	0	0	0	2	0	0	0	2	0	0	0	0	0	0	0	1	0	0	0	0	23	371845	19206	391051	3631.58	394682	371845	391051	394682	984662	984662	30	48	1	5389.1
56	2	0	0	0	0	0	0	0	0	0	0	4	0	1	0	0	0	0	0	0	0	0	0	0	0	2	0	0	0	0	0	1	0	1	11	285492	0	285492	32461.7	317953	285492	285492	317953	499768	499768	30	48	1	8438.76
57	0	0	0	1	1	5	0	0	0	0	0	0	0	0	0	0	0	1	0	0	0	0	0	0	0	0	0	0	0	0	0	0	0	0	8	10442.2	1087.5	11529.7	2800	14329.7	10442.2	11529.7	14329.7	21954	21954	24	48	1	2272.3
58	0	0	2	2	0	0	0	0	0	0	0	0	0	0	3	0	0	2	0	0	0	0	0	0	0	0	0	0	0	0	0	0	0	0	9	39884.4	0	39884.4	2354.65	42239.1	39884.4	39884.4	42239.1	101373	101373	30	48	1	2408.06
59	0	0	0	3	4	0	0	0	0	0	1	1	0	0	0	0	0	0	0	0	0	2	0	0	0	2	0	0	0	0	0	0	0	0	13	318452	4350	322802	13861.7	336664	318452	322802	336664	839452	839452	30	48	1	2859.22
60	0	0	2	2	1	4	0	0	0	0	0	0	0	0	0	0	0	11	0	0	0	0	0	1	0	0	0	0	0	0	0	1	0	0	22	276434	1087.5	277522	32240	309762	276434	277522	309762	528160	528160	30	48	1	4626.75
61	1	0	0	3	0	0	0	1	0	0	0	1	0	0	0	0	0	1	0	0	0	0	0	0	0	0	0	1	0	0	3	0	0	0	11	43176.6	28000	71176.6	30088.7	101265	43176.6	71176.6	101265	82881.4	82881.4	30	17	1	1137.78
62	0	0	1	3	0	0	0	0	0	0	1	0	0	0	0	0	0	0	0	0	0	0	0	1	0	2	0	0	0	0	0	0	0	0	8	59202.4	0	59202.4	43861.7	103064	59202.4	59202.4	103064	139368	139368	30	17	1	1414.47
63	0	0	1	4	0	1	1	1	0	0	1	1	0	0	0	1	0	0	0	0	1	0	0	0	0	0	0	0	0	2	0	0	0	0	14	86444.6	136402	222847	41461.6	264308	86444.6	222847	264308	186667	186667	30	17	1	2011.43
64	0	0	0	3	0	0	1	0	0	0	0	6	0	0	0	0	0	0	0	0	2	2	0	1	0	0	0	0	0	0	0	0	0	0	15	393977	226402	620379	30000	650379	393977	620379	650379	938058	938058	30	17	1	4085.81
65	0	0	0	2	0	0	0	0	0	0	0	1	0	0	0	0	0	0	0	0	0	0	0	0	0	0	0	0	0	0	0	0	0	0	3	32734.4	0	32734.4	0	32734.4	32734.4	32734.4	32734.4	60927.3	60927.3	20	19	1	4620.19
66	0	0	3	10	0	0	1	1	0	2	0	0	3	0	2	0	0	0	1	0	0	0	0	0	0	1	0	0	0	2	0	0	0	1	27	85022.8	26402	111425	15083.4	126508	85022.8	111425	126508	224955	224955	31	19	1	4835.74
67	0	0	0	11	0	0	0	0	0	0	1	2	0	0	0	1	1	1	0	0	0	0	0	0	0	4	0	0	0	0	0	0	0	0	21	142090	0	142090	125697	267787	142090	142090	267787	295328	295328	29	19	1	5454.67
68	0	0	3	7	0	0	1	0	1	0	0	1	0	0	0	0	0	2	0	0	0	0	0	1	0	6	0	0	0	0	0	0	0	0	22	98595.4	12402	110997	71585	182582	98595.4	110997	182582	231916	231916	31	19	1	7330.06
69	0	0	1	0	0	0	1	0	0	0	0	0	0	1	0	1	0	0	0	0	0	0	0	0	0	1	0	0	0	0	0	0	0	0	5	14391.1	6402	20793.1	44469.3	65262.4	14391.1	20793.1	65262.4	39484	39484	31	19	1	9701.86
70	0	0	4	0	0	1	0	1	0	0	0	0	0	0	0	0	0	0	0	0	0	0	0	0	0	0	0	0	0	1	0	0	0	0	7	38000	20000	58000	2241.58	60241.6	38000	58000	60241.6	114929	114929	10	24	1	2495.91
71	0	0	2	1	0	0	0	6	0	0	0	0	0	0	0	0	0	1	0	0	0	0	0	0	0	0	0	0	0	0	0	0	0	0	10	29442.2	120000	149442	0	149442	29442.2	149442	149442	79418.6	79418.6	30	24	1	2710.46
72	0	0	1	0	0	0	0	0	0	0	0	0	0	0	0	0	0	0	0	0	0	0	0	0	0	0	1	0	0	0	0	0	0	0	2	9500	49500	59000	0	59000	9500	59000	59000	28732.3	28732.3	30	46	1	1242.04
73	0	0	4	0	0	1	0	0	0	0	0	0	0	0	0	0	0	3	0	0	0	0	0	0	0	0	0	0	0	0	0	0	0	0	8	52850	0	52850	560	53410	52850	52850	53410	139907	139907	30	46	1	1451.14
74	0	0	0	0	0	0	0	0	0	0	0	0	0	0	0	0	0	0	0	0	0	0	0	0	0	0	0	0	0	0	0	0	0	0	0	0	0	0	0	0	0	0	0	0	0	30	46	1	2024.88
75	0	0	2	3	0	6	0	0	0	0	1	0	1	1	1	0	0	0	0	0	0	0	0	0	0	1	0	0	0	0	0	0	0	0	16	73593.5	0	73593.5	11465.7	85059.2	73593.5	73593.5	85059.2	178852	178852	30	46	1	3930.53
76	0	0	0	3	0	0	2	2	0	0	0	1	0	2	0	0	0	0	0	0	0	0	0	0	0	0	0	0	0	0	0	0	0	0	10	48008.7	52804	100813	0	100813	48008.7	100813	100813	96058.6	96058.6	30	46	1	6922.45
77	0	0	1	2	0	2	0	0	0	0	0	1	0	1	0	2	0	0	0	0	0	0	0	1	0	0	0	0	0	1	0	0	0	0	11	47125.5	0	47125.5	107879	155004	47125.5	47125.5	155004	100411	100411	30	45	1	1346
78	0	0	0	0	0	1	0	0	0	0	0	0	0	0	0	1	0	0	0	0	0	0	0	0	0	0	0	0	0	0	0	0	0	0	2	0	0	0	38098.5	38098.5	0	0	38098.5	0	0	30	45	1	1625.09
79	0	0	1	0	0	0	1	0	0	0	0	0	0	0	0	0	0	2	0	0	0	0	1	0	0	1	0	0	0	0	0	0	0	0	6	25723.2	6402	32125.2	6930.84	39056	25723.2	32125.2	39056	47420.6	47420.6	30	45	1	2239.97
80	0	0	0	0	0	0	0	0	0	0	0	1	0	0	0	0	1	1	0	0	0	0	0	1	0	0	0	0	0	0	0	0	0	0	4	26700	0	26700	90435	117135	26700	26700	117135	41997.5	41997.5	30	45	1	4236.19
81	0	0	1	3	1	0	0	0	0	0	0	5	0	1	1	0	0	1	0	0	0	1	1	0	0	0	0	0	0	0	0	0	0	0	15	274391	1087.5	275478	784.884	276263	274391	275478	276263	606660	606660	30	45	1	7278.7
82	1	0	0	0	0	0	0	0	0	0	0	0	0	0	0	0	0	0	0	0	0	0	0	0	0	0	0	0	0	0	0	0	0	0	1	0	0	0	9300	9300	0	0	9300	0	0	30	47	1	2493.94
83	0	0	0	1	0	0	0	0	0	0	0	1	0	0	0	0	0	0	0	0	0	0	0	0	0	0	2	0	0	0	1	0	0	0	5	27242.2	99000	126242	6929.58	133172	27242.2	126242	133172	47299.4	47299.4	29	47	1	2668.96
84	0	0	0	0	0	0	0	0	0	0	0	0	0	0	1	0	0	0	0	0	0	0	0	0	0	0	0	0	0	0	0	0	0	0	1	0	0	0	784.884	784.884	0	0	784.884	0	0	30	47	1	3358.82
85	0	0	0	1	0	0	2	0	0	0	0	0	0	0	1	0	0	1	0	0	0	0	0	0	0	0	0	0	0	0	1	0	0	0	6	10442.2	12804	23246.2	7714.46	30960.7	10442.2	23246.2	30960.7	21954	21954	30	47	1	5176.07
86	0	0	3	3	0	0	0	0	0	0	0	0	0	0	0	0	0	1	0	0	0	0	0	0	0	0	0	0	0	0	0	0	0	0	7	49926.6	0	49926.6	0	49926.6	49926.6	49926.6	49926.6	135407	135407	30	47	1	8023.48
87	0	0	4	2	0	0	0	0	0	0	0	0	0	0	0	0	0	2	0	0	0	0	0	0	0	0	0	0	0	0	0	0	0	0	8	58884.4	0	58884.4	0	58884.4	58884.4	58884.4	58884.4	158837	158837	30	40	1	1641.24
88	1	0	4	1	0	0	0	0	0	0	0	0	0	0	0	0	0	0	0	0	0	0	0	1	0	0	0	0	0	0	0	0	0	0	7	43492.2	0	43492.2	39300	82792.2	43492.2	43492.2	82792.2	128557	128557	30	40	1	1932.61
89	0	0	3	4	0	0	2	0	0	0	0	1	0	0	0	0	1	1	0	0	0	0	0	0	0	0	0	0	0	1	0	0	0	0	13	77168.8	12804	89972.8	62116.6	152089	77168.8	89972.8	152089	182706	182706	30	40	1	2554.55
90	0	0	0	3	0	0	1	0	0	0	0	2	0	2	3	0	0	5	0	0	0	0	0	0	0	0	0	0	0	0	0	0	0	0	16	94508.7	6402	100911	2354.65	103265	94508.7	100911	103265	171360	171360	30	40	1	4626.67
91	0	0	2	9	1	0	0	0	0	0	1	0	0	2	1	1	0	1	0	0	0	2	0	0	0	0	0	0	0	0	0	0	0	0	20	363388	1087.5	364475	38323.3	402799	363388	364475	402799	974843	974843	30	40	1	7611.74
92	0	0	1	0	0	0	0	0	0	0	1	0	0	0	0	0	0	1	0	0	0	0	0	0	0	0	0	0	0	0	0	0	0	0	3	47675.8	0	47675.8	0	47675.8	47675.8	47675.8	47675.8	106810	106810	15	16	1	5177.54
93	0	0	1	0	0	0	0	0	0	1	2	0	0	1	0	0	0	0	0	0	0	0	0	0	0	0	0	0	0	0	0	0	0	2	7	84044.1	0	84044.1	186.25	84230.3	84044.1	84044.1	84230.3	183945	183945	30	16	1	5483.44
94	0	0	0	0	3	1	0	0	0	0	0	0	0	1	0	1	0	1	0	0	0	0	0	0	0	1	0	0	0	0	0	0	0	1	9	11441.8	3262.5	14704.3	45029.3	59733.6	11441.8	14704.3	59733.6	21556.4	21556.4	30	16	1	6136.48
95	0	0	0	0	0	0	0	0	0	0	0	0	0	0	0	1	0	0	0	0	0	0	0	2	0	0	0	0	0	0	0	0	0	0	3	0	0	0	97538.5	97538.5	0	0	97538.5	0	0	30	16	1	8158.01
96	0	0	0	4	1	4	0	1	0	0	0	2	0	5	2	0	0	0	0	0	0	0	0	0	0	3	0	0	0	1	0	0	0	0	23	89924.1	21087.5	111012	26283.9	137295	89924.1	111012	137295	175613	175613	30	16	1	11088.5
97	0	0	3	0	0	0	0	0	0	0	2	0	0	1	0	0	0	0	0	0	0	0	0	0	0	0	0	0	0	0	0	0	0	0	6	99842.7	0	99842.7	0	99842.7	99842.7	99842.7	99842.7	236452	236452	30	10	1	4333.05
98	0	0	0	0	1	2	0	0	0	0	0	0	4	5	0	0	0	0	1	0	0	1	0	0	0	4	0	0	0	3	0	0	0	4	25	154358	1087.5	155446	37125.2	192571	154358	155446	192571	411246	411246	30	10	1	4418.99
99	0	0	0	6	0	0	0	0	0	0	0	3	0	0	0	1	0	0	0	0	0	1	0	0	0	1	0	0	0	0	0	0	0	0	12	221703	0	221703	44469.3	266173	221703	221703	266173	530355	530355	30	10	1	5295.52
100	0	0	0	4	0	0	0	0	0	0	0	5	0	2	0	0	1	4	0	0	0	1	0	0	0	1	0	0	0	2	0	0	0	0	20	283801	0	283801	70729	354530	283801	283801	354530	625249	625249	30	10	1	7231.13
101	0	0	10	2	0	0	0	1	0	0	0	1	0	0	1	0	0	1	0	0	0	0	0	0	0	0	0	0	0	0	0	0	0	0	16	132684	20000	152684	784.884	153469	132684	152684	153469	356576	356576	30	53	1	7286.63
102	0	0	4	0	0	0	0	0	0	0	0	2	0	1	0	0	0	0	0	0	0	0	0	0	0	0	0	0	0	0	0	0	0	0	7	86391.1	0	86391.1	0	86391.1	86391.1	86391.1	86391.1	193024	193024	30	59	1	3708.62
103	0	0	1	0	0	0	0	1	0	0	4	0	1	1	0	0	1	0	0	0	0	0	0	0	0	0	0	0	0	0	0	1	0	2	12	342496	20000	362496	60825	423321	342496	362496	423321	675301	675301	30	59	1	4020.03
104	0	0	0	0	0	0	0	0	1	0	2	0	0	6	0	0	0	0	0	0	0	0	0	0	0	1	0	0	0	0	0	1	0	1	12	289399	6000	295399	6930.84	302329	289399	295399	302329	558345	558345	30	59	1	4626.62
105	1	0	1	1	4	3	5	0	1	0	0	0	0	0	15	0	0	8	0	0	0	0	0	0	0	4	0	0	0	0	0	0	0	0	43	54592.2	42360	96952.2	50476.6	147429	54592.2	96952.2	147429	108969	108969	30	59	1	6635.03
106	0	0	1	2	1	6	0	1	0	0	0	1	0	1	5	0	0	6	0	0	0	3	0	0	0	0	0	0	0	0	1	0	0	0	28	447325	21087.5	468413	14214	482627	447325	468413	482627	1.19309e+06	1.19309e+06	30	59	1	9574.61
107	0	0	2	1	0	2	0	0	0	0	3	0	0	1	1	0	0	0	0	0	0	0	0	0	0	2	0	0	0	2	0	0	0	0	14	129061	0	129061	19129.7	148190	129061	129061	148190	291100	291100	30	58	1	798.024
108	0	0	1	7	0	0	0	0	0	0	3	0	0	0	3	0	0	6	0	0	0	0	0	0	0	2	3	0	0	0	0	0	0	0	25	177323	148500	325823	16216.3	342039	177323	325823	342039	383340	383340	30	58	1	1102.45
109	0	0	6	4	0	0	0	0	0	0	0	3	0	0	0	0	0	1	0	0	0	0	0	0	0	0	0	0	0	0	0	2	0	0	16	533169	0	533169	0	533169	533169	533169	533169	1.03995e+06	1.03995e+06	30	58	1	1798.74
110	0	0	4	4	0	0	0	1	0	0	0	1	0	0	0	0	0	0	0	0	0	2	0	0	0	2	0	0	0	0	0	0	0	0	14	328719	20000	348719	13861.7	362581	328719	348719	362581	898258	898258	30	58	1	3741.58
111	0	0	4	17	0	2	0	0	0	0	1	0	2	0	16	0	0	2	0	0	0	0	0	0	0	0	0	0	0	1	0	0	0	0	45	174493	0	174493	16139.7	190633	174493	174493	190633	433008	433008	30	54	1	5792.69
112	0	0	1	4	1	0	0	0	0	0	1	0	0	1	0	0	0	0	0	0	0	0	0	0	0	0	0	0	0	0	0	0	0	0	8	69585.7	1087.5	70673.2	0	70673.2	69585.7	70673.2	70673.2	163748	163748	30	35	1	5295.46
113	0	0	3	0	0	0	1	0	0	0	0	0	0	0	0	1	0	1	0	0	0	1	0	0	0	0	0	0	0	0	0	0	0	0	7	156950	6402	163352	37538.5	200890	156950	163352	200890	442096	442096	30	35	1	5610.43
114	0	0	3	9	2	3	0	0	0	0	0	0	0	3	0	0	0	2	0	0	0	0	0	0	0	0	0	0	0	0	0	3	0	7	32	689708	2175	691883	1680	693563	689708	691883	693563	1.33066e+06	1.33066e+06	30	35	1	6395.55
115	0	0	3	0	3	0	0	3	0	1	0	0	0	1	0	2	0	0	0	0	0	0	0	0	0	0	0	0	0	4	0	1	0	2	20	228592	63262.5	291855	81989.5	373844	228592	291855	373844	453758	453758	30	35	1	8714.09
116	0	0	0	0	0	0	0	0	0	0	2	1	0	0	4	0	0	1	0	0	0	0	0	0	0	1	0	0	0	0	0	0	0	0	9	93151.6	0	93151.6	10070.4	103222	93151.6	93151.6	103222	181501	181501	62	50	1	1634.44
117	0	0	0	5	0	0	0	0	0	0	1	2	0	0	0	0	0	1	0	0	0	0	0	0	0	2	0	0	0	0	0	1	0	0	12	301137	0	301137	13861.7	314999	301137	301137	314999	565413	565413	62	50	1	1953.35
118	0	0	2	5	0	0	1	0	0	0	1	3	0	0	1	0	0	1	0	0	0	2	0	1	0	3	0	0	0	0	0	0	0	0	20	396887	6402	403289	51577.4	454866	396887	403289	454866	999842	999842	62	50	1	2567.8
119	2	1	1	10	0	0	1	1	0	0	0	2	0	5	1	0	0	0	0	0	0	9	1	0	0	1	0	0	0	0	0	0	0	0	35	1.25079e+06	26402	1.27719e+06	26315.7	1.3035e+06	1.25079e+06	1.27719e+06	1.3035e+06	3.41689e+06	3.41689e+06	62	50	1	4550.7
120	0	0	0	28	0	0	0	0	0	0	4	2	0	1	1	0	0	1	0	0	0	0	2	0	0	7	0	0	0	0	0	3	0	0	49	928672	0	928672	49300.8	977973	928672	928672	977973	1.80664e+06	1.80664e+06	62	50	1	7520.81
121	1	0	2	2	1	0	1	0	0	0	0	0	0	0	0	1	0	2	0	0	0	0	0	0	0	3	0	0	0	0	0	0	0	0	13	39884.4	7489.5	47373.9	67631	115005	39884.4	47373.9	115005	101373	101373	30	44	1	2139.48
122	0	0	6	8	0	1	1	0	0	0	0	3	0	0	0	0	0	7	0	0	0	1	0	1	0	6	0	0	0	0	0	0	5	1	40	1.12571e+07	6402	1.12635e+07	72145	1.13357e+07	325938	332340	404485	3.08883e+07	790765	30	44	1	2739.54
123	0	0	0	7	0	0	0	1	0	0	0	0	0	1	0	2	0	0	0	0	0	0	0	0	0	2	0	0	0	1	0	0	0	0	14	43336.5	20000	63336.5	90620.2	153957	43336.5	63336.5	153957	106147	106147	30	44	1	3987.21
124	1	0	0	0	0	0	1	0	0	0	0	0	0	1	1	0	0	0	0	0	0	0	0	0	0	0	3	0	0	0	0	0	0	0	7	4891.05	154902	159793	10084.9	169878	4891.05	159793	169878	10751.7	10751.7	30	39	1	1854.71
125	0	0	1	1	8	1	0	0	0	1	1	0	3	0	0	0	0	0	0	0	0	1	1	0	0	1	0	0	0	0	0	0	0	0	19	178041	8700	186741	8847.09	195588	178041	186741	195588	461721	461721	30	39	1	2172.1
126	0	0	1	1	0	0	0	0	0	0	0	2	0	0	1	0	0	5	0	0	0	0	0	0	0	0	0	0	0	0	0	0	1	0	11	2.26948e+06	0	2.26948e+06	784.884	2.27027e+06	83242.2	83242.2	84027.1	6.17085e+06	151333	30	39	1	2797.25
127	0	0	0	0	0	0	0	0	0	0	1	2	0	0	0	3	0	0	0	0	0	1	0	0	0	0	0	0	0	0	0	0	0	0	7	200226	0	200226	112615	312841	200226	200226	312841	484667	484667	30	39	1	4667.25
128	0	0	5	6	0	0	0	0	0	0	1	0	0	5	3	0	0	3	0	0	0	2	0	0	0	1	0	0	0	0	0	2	0	1	29	785585	0	785585	9285.49	794870	785585	785585	794870	1.77525e+06	1.77525e+06	30	39	1	7566.85
129	0	0	0	0	0	6	1	0	0	0	0	0	0	0	0	0	0	2	0	0	0	0	0	0	0	1	0	0	0	0	2	0	0	0	12	9900	6402	16302	24150	40452	9900	16302	40452	16652.1	16652.1	30	57	1	241.384
130	0	0	1	0	1	1	4	1	0	0	0	1	0	0	0	0	0	2	0	0	0	0	0	0	0	1	0	0	0	0	0	0	0	0	12	41150	46695.5	87845.5	7490.84	95336.3	41150	87845.5	95336.3	79055.9	79055.9	30	57	1	462.052
131	0	0	1	0	0	0	0	0	0	0	0	0	0	1	0	0	0	0	0	0	0	0	0	0	0	0	0	0	0	0	0	0	0	0	2	14391.1	0	14391.1	0	14391.1	14391.1	14391.1	14391.1	39484	39484	30	57	1	1148.3
132	0	0	0	3	0	0	0	2	0	0	0	1	0	0	1	0	0	0	0	0	0	2	0	0	0	0	0	0	0	0	0	2	0	0	11	669227	40000	709227	784.884	710011	669227	709227	710011	1.47341e+06	1.47341e+06	30	57	1	3135.73
133	0	0	0	2	0	0	0	0	0	0	0	3	0	3	4	0	0	0	0	0	0	0	0	0	0	2	0	0	0	0	0	0	0	0	14	90907.6	0	90907.6	17001.2	107909	90907.6	90907.6	107909	160525	160525	30	57	1	6064.1
134	0	0	0	0	0	0	0	0	0	0	0	0	0	0	0	0	0	0	0	0	0	0	0	0	0	0	0	0	0	0	0	0	0	1	1	1600.71	0	1600.71	0	1600.71	1600.71	1600.71	1600.71	2478.69	2478.69	30	49	1	4649.22
135	1	0	1	0	0	0	0	0	0	0	0	0	0	0	1	1	0	0	0	0	0	0	0	0	0	1	1	0	0	0	0	0	0	1	7	11100.7	49500	60600.7	54554.2	115155	11100.7	60600.7	115155	31211	31211	30	49	1	5410.06
136	0	0	1	5	0	0	0	0	0	0	1	0	0	2	0	0	0	0	0	0	0	0	0	0	0	0	0	0	0	1	0	0	0	1	11	81569.6	0	81569.6	1681.58	83251.2	81569.6	81569.6	83251.2	190606	190606	30	49	1	7348.08
137	0	0	8	11	0	1	1	0	0	0	0	0	1	2	8	0	0	3	0	0	0	2	0	0	0	1	0	0	0	0	0	0	0	0	38	408046	6402	414448	14159.9	428608	408046	414448	428608	1.12139e+06	1.12139e+06	30	54	1	6256.82
138	0	0	1	12	0	1	0	2	0	0	0	3	0	2	1	0	0	0	0	0	0	0	0	0	0	5	0	0	0	1	0	0	0	1	29	152039	40000	192039	37680.7	229720	152039	192039	229720	317264	317264	30	54	1	6460.38
139	0	0	2	7	0	2	0	0	0	0	0	0	0	1	0	0	0	1	0	0	0	0	1	0	0	0	0	0	0	1	0	0	0	0	15	73609.7	0	73609.7	2801.58	76411.3	73609.7	73609.7	76411.3	173974	173974	30	54	1	6536.23
140	0	0	1	4	0	1	0	0	0	0	1	0	0	1	1	0	0	0	0	0	0	0	0	0	0	0	0	0	0	0	0	0	0	0	9	69585.7	0	69585.7	1344.88	70930.6	69585.7	69585.7	70930.6	163748	163748	30	54	1	7909.26
141	0	0	1	1	1	0	0	0	0	0	0	0	0	0	7	0	0	0	0	0	0	0	0	0	0	0	0	0	0	0	0	0	0	0	10	14992.2	1087.5	16079.7	5494.19	21573.9	14992.2	16079.7	21573.9	42360.2	42360.2	30	54	1	10368.1
142	0	0	6	0	0	3	0	0	1	0	0	1	0	1	1	0	0	5	0	0	0	0	0	0	0	0	0	0	0	0	0	0	0	0	18	108391	6000	114391	2464.88	116856	108391	114391	116856	258447	258447	30	54	1	1113.49
143	0	0	4	2	0	0	1	0	0	0	1	0	0	0	1	0	0	1	0	0	0	3	0	0	0	0	0	0	0	0	0	0	0	0	13	457660	6402	464062	784.884	464847	457660	464062	464847	1.26298e+06	1.26298e+06	30	54	1	1383.62
144	0	1	2	6	0	0	1	1	0	0	0	1	0	2	8	1	0	1	0	0	0	1	1	1	0	0	0	0	0	1	0	0	0	0	28	218844	26402	245246	75499.1	320745	218844	245246	320745	552926	552926	30	54	1	2070.58
145	0	0	4	9	0	0	3	0	1	0	0	5	0	1	1	2	0	0	0	0	0	1	0	0	0	1	0	0	0	1	0	0	0	0	29	324571	25206	349777	84474.2	434251	324571	349777	434251	764262	764262	30	54	1	4056.51
146	0	0	1	2	0	1	2	0	0	0	0	0	0	0	0	0	0	1	0	0	0	0	0	0	0	0	0	0	0	0	0	0	0	0	7	25434.4	12804	38238.4	560	38798.4	25434.4	38238.4	38798.4	64314.3	64314.3	30	54	1	6437.42
147	0	0	11	5	0	0	1	0	0	0	0	0	0	4	0	0	0	0	0	0	0	0	0	0	0	0	0	0	0	0	0	2	0	0	23	535525	6402	541927	0	541927	535525	541927	541927	1.13091e+06	1.13091e+06	30	7	1	19589.1
148	0	0	0	2	0	0	0	0	0	0	0	5	0	0	0	0	0	0	0	0	0	0	0	0	0	0	0	0	0	0	0	0	0	0	7	119734	0	119734	0	119734	119734	119734	119734	195613	195613	30	7	1	19861.4
149	0	1	3	5	0	0	2	0	0	0	0	2	0	3	7	1	0	0	0	0	0	1	0	0	0	1	0	0	0	1	0	0	0	0	27	238219	12804	251023	51645.1	302668	238219	251023	302668	602091	602091	30	7	1	20454.5
150	0	0	0	2	0	0	1	0	0	0	0	3	0	0	1	0	0	0	0	0	0	0	0	0	0	2	0	0	0	0	0	0	0	0	9	76234.4	6402	82636.4	14646.6	97283	76234.4	82636.4	97283	128270	128270	30	7	1	21858.5
151	0	0	0	3	0	0	0	0	0	0	0	6	0	0	0	1	0	0	0	0	0	0	0	0	0	0	0	0	0	0	0	0	0	0	10	146977	0	146977	37538.5	184515	146977	146977	184515	242912	242912	30	7	1	23104.7
152	0	2	3	6	0	1	2	0	0	0	1	0	0	1	0	0	0	0	0	0	1	2	0	0	0	4	0	0	0	0	0	0	0	0	23	347741	122804	470545	28283.4	498828	347741	470545	498828	944781	944781	30	7	1	15706.2
153	0	0	1	1	0	0	1	0	0	0	0	0	0	2	0	0	0	0	0	0	0	0	0	0	0	1	0	0	0	0	0	0	0	0	6	24774.3	6402	31176.3	6930.84	38107.1	24774.3	31176.3	38107.1	63863.6	63863.6	30	7	1	15501.4
154	0	0	1	6	0	0	1	0	0	0	0	0	0	0	1	0	0	2	0	0	0	0	0	0	0	0	0	0	0	0	0	0	0	1	12	53953.9	6402	60355.9	784.884	61140.8	53953.9	60355.9	61140.8	129631	129631	30	7	1	15341.5
155	0	0	1	1	0	0	0	0	0	0	0	1	0	0	4	0	0	4	0	0	0	0	1	0	0	1	0	0	0	0	0	0	0	2	15	66066.8	0	66066.8	10070.4	76137.2	66066.8	66066.8	76137.2	116329	116329	30	7	1	15009.3
156	2	0	0	0	0	0	1	0	0	0	0	2	0	0	0	0	0	0	0	0	0	0	1	0	0	0	1	0	0	0	0	0	0	0	7	49823.2	55902	105725	18600	124325	49823.2	105725	124325	69379	69379	30	7	1	13874.2
157	0	0	4	3	0	0	0	1	0	0	0	5	0	2	0	1	0	1	0	0	0	6	1	0	0	1	1	0	0	0	0	0	0	0	26	925282	69500	994782	44469.3	1.03925e+06	925282	994782	1.03925e+06	2.44147e+06	2.44147e+06	48	19	1	3495.5
158	0	1	8	4	0	0	0	0	1	0	1	0	0	2	6	0	0	0	0	0	0	3	0	0	0	56	0	0	0	1	0	0	0	0	83	512062	6000	518062	394518	912580	512062	518062	912580	1.41893e+06	1.41893e+06	48	19	1	4145.29
159	4	0	7	5	1	0	0	1	0	0	4	1	0	16	0	1	1	5	0	0	0	2	0	0	0	7	0	1	0	0	0	0	0	0	56	598621	29087.5	627709	183689	811398	598621	627709	811398	1.49075e+06	1.49075e+06	48	19	1	5599.43
160	0	0	3	8	0	1	1	1	0	0	0	10	0	2	0	2	0	0	0	0	0	0	0	0	0	4	0	0	0	2	0	1	0	0	35	491720	26402	518122	106723	624845	491720	518122	624845	905290	905290	48	19	1	7698.64
161	0	0	8	1	0	0	0	0	0	0	0	2	0	1	1	0	0	4	0	0	0	0	0	0	0	2	0	0	0	5	0	0	0	0	24	149683	0	149683	23054.5	172738	149683	149683	172738	354885	354885	48	48	1	1877.66
162	0	0	1	3	0	0	0	0	0	0	0	11	0	0	0	0	0	1	0	0	0	0	0	0	0	0	0	0	0	0	0	0	0	0	16	270177	0	270177	0	270177	270177	270177	270177	448328	448328	48	48	1	2148.3
163	0	0	1	2	0	0	0	0	0	0	0	0	0	0	0	0	0	0	0	0	0	0	0	0	0	0	0	0	0	0	0	0	0	0	3	20484.4	0	20484.4	0	20484.4	20484.4	20484.4	20484.4	55988.2	55988.2	6	48	1	2794.16
164	0	0	0	17	0	1	0	1	0	0	0	0	0	2	0	0	0	0	0	0	0	0	0	0	0	0	1	0	0	0	0	0	0	1	23	104750	69500	174250	560	174810	104750	174250	174810	255657	255657	48	48	1	4755.35
165	1	0	3	2	0	0	0	0	0	0	0	4	0	1	0	0	0	1	0	0	1	0	1	0	0	4	0	0	0	0	0	0	0	0	18	142649	110000	252649	37023.4	289672	142649	252649	289672	269252	269252	48	48	1	7754.06
166	0	0	2	2	0	0	1	0	0	0	2	0	0	0	0	2	0	1	0	0	0	1	0	0	0	0	0	0	0	0	0	0	0	0	11	222106	6402	228508	75076.9	303585	222106	228508	303585	571384	571384	48	43	1	2067.83
167	1	0	1	0	0	1	0	1	0	0	0	5	0	0	0	0	0	1	0	0	0	0	0	0	0	6	1	0	0	0	0	0	0	0	17	123200	69500	192700	51445	244145	123200	192700	244145	205416	205416	48	43	1	2696.87
168	0	0	4	7	0	0	0	0	0	0	1	3	0	0	0	1	0	3	0	0	0	0	0	1	0	3	0	0	0	0	1	0	0	0	24	189771	0	189771	95260.6	285032	189771	189771	285032	406069	406069	48	43	1	4753.83
169	0	0	3	2	0	0	0	0	0	0	2	2	0	2	1	0	0	1	0	0	0	3	0	0	0	3	0	0	0	0	0	0	0	0	19	534668	0	534668	21577.4	556246	534668	534668	556246	1.39285e+06	1.39285e+06	48	43	1	7705.37
170	0	0	1	4	0	0	0	1	0	0	0	2	0	1	0	0	1	0	1	0	0	0	0	0	0	1	0	0	0	0	0	0	0	0	12	79859.9	18109.1	97969	69042.9	167012	79859.9	97969	167012	161339	161339	26	20	1	7402.96
171	0	4	8	16	2	7	0	0	0	0	2	0	0	2	7	2	0	6	0	0	1	2	0	0	0	2	1	0	0	4	0	0	1	2	69	2.70859e+06	161675	2.87027e+06	105079	2.97535e+06	522351	684026	789105	7.38082e+06	1.36131e+06	48	20	1	7656.52
172	0	0	2	26	0	1	2	1	0	0	2	2	0	5	0	0	0	4	0	0	0	1	0	0	0	8	0	0	0	1	0	0	0	0	55	439504	32804	472308	57688.3	529997	439504	472308	529997	1.05327e+06	1.05327e+06	48	20	1	8317.32
173	0	0	2	7	3	0	4	0	0	0	7	8	0	2	0	3	0	0	0	0	0	0	1	0	0	0	0	0	0	0	1	0	0	0	38	480131	28870.5	509002	119545	628547	480131	509002	628547	934035	934035	48	43	1	9149.77
174	0	0	4	6	0	0	1	0	0	0	1	1	0	4	0	1	0	0	0	0	1	1	0	2	0	0	0	0	0	0	0	0	0	0	22	268993	116402	385395	97538.5	482934	268993	385395	482934	690699	690699	48	43	1	10607.8
175	0	1	2	0	0	0	1	0	0	0	4	0	0	0	0	1	0	0	0	0	0	0	0	0	0	0	0	0	0	0	0	0	0	0	9	152488	6402	158890	37538.5	196429	152488	158890	196429	337056	337056	48	42	1	10307.4
176	0	0	8	9	0	0	0	0	0	0	0	2	0	2	0	2	0	0	0	0	0	0	1	0	0	0	0	1	0	0	0	0	0	0	25	185035	8000	193035	75076.9	268112	185035	193035	268112	443392	443392	48	42	1	10612.1
177	0	1	0	6	0	1	1	0	0	0	0	0	0	1	1	0	0	4	0	0	0	0	0	0	0	0	0	0	0	0	0	0	0	0	15	58229.5	6402	64631.5	1344.88	65976.4	58229.5	64631.5	65976.4	126407	126407	48	42	1	11280
178	3	0	0	0	0	0	0	0	0	0	1	2	0	1	1	0	0	0	0	0	0	2	0	2	0	0	0	0	0	0	0	1	0	0	13	520617	0	520617	88684.9	609302	520617	520617	609302	1.19484e+06	1.19484e+06	48	42	1	12820.3
179	0	0	0	0	0	0	0	0	0	0	1	1	0	0	2	0	0	0	0	0	0	0	0	0	0	1	0	0	0	0	0	1	0	0	6	246976	0	246976	8500.61	255476	246976	246976	255476	455276	455276	48	42	1	15181.7
180	0	0	0	1	0	0	0	0	0	0	1	0	0	0	0	0	0	2	0	0	0	1	0	0	0	0	0	0	0	0	0	0	0	0	5	172118	0	172118	0	172118	172118	172118	172118	447605	447605	48	41	1	2085.16
181	0	0	1	1	0	0	0	0	0	0	1	0	0	0	1	0	0	0	0	0	0	1	0	0	1	0	0	0	0	0	0	0	0	0	6	171718	0	171718	6184.88	177903	171718	171718	177903	459685	459685	48	41	1	2348.79
182	0	0	1	11	1	0	0	0	0	0	0	1	0	1	0	0	0	1	0	0	0	1	1	0	0	0	0	0	0	0	0	0	0	0	18	231329	1087.5	232416	0	232416	231329	232416	232416	580998	580998	48	41	1	3018.44
183	0	1	1	6	0	0	1	0	0	0	0	0	0	0	11	3	0	0	0	0	0	0	0	0	0	3	0	0	0	0	0	2	0	0	28	427038	6402	433440	142042	575482	427038	433440	575482	814788	814788	48	41	1	5022.49
184	0	0	1	0	0	0	1	0	0	0	2	2	0	1	0	2	1	0	0	0	0	0	1	0	0	0	0	0	0	0	0	0	0	0	11	130666	6402	137068	135512	272580	130666	137068	272580	248367	248367	45	16	1	1295.89
185	0	3	3	1	2	1	4	0	0	0	1	0	0	2	0	0	2	1	0	0	1	0	0	0	0	0	0	0	0	0	0	0	0	0	21	83705.8	137783	221489	121430	342919	83705.8	221489	342919	201157	201157	45	16	1	1511.4
186	0	0	0	0	0	0	0	0	0	0	0	0	0	0	0	0	0	0	0	0	0	0	0	1	0	0	0	0	0	0	0	0	0	0	1	0	0	0	30000	30000	0	0	30000	0	0	51	6	1	76.1775
187	0	0	0	0	0	0	1	0	0	0	0	0	0	0	0	1	0	0	0	0	0	0	1	0	0	0	0	0	0	0	0	0	0	0	3	6323.2	6402	12725.2	37538.5	50263.7	6323.2	12725.2	50263.7	2036.15	2036.15	26	6	1	367.509
188	1	1	2	0	0	0	0	0	0	0	0	4	2	1	4	0	0	2	0	0	0	0	0	0	0	19	0	1	0	0	0	0	0	0	37	121376	8000	129376	144906	274282	121376	129376	274282	220138	220138	51	6	1	1008.2
189	0	0	0	0	0	0	0	0	0	0	0	0	0	1	0	0	0	0	0	0	0	0	0	0	0	1	0	0	0	0	0	0	0	0	2	4891.05	0	4891.05	6930.84	11821.9	4891.05	4891.05	11821.9	10751.7	10751.7	4	6	1	2006.88
190	0	0	5	0	0	0	2	4	0	0	0	0	0	4	0	0	1	0	0	0	1	0	0	0	0	0	0	0	0	0	0	1	0	0	18	259064	202804	461868	60435	522303	259064	461868	522303	538520	538520	51	6	1	3142.9
191	0	5	6	4	1	0	0	0	0	1	2	0	0	0	0	0	0	2	0	0	0	1	0	0	0	0	0	0	0	0	0	0	1	0	23	2.46799e+06	1087.5	2.46907e+06	186.25	2.46926e+06	281747	282834	283020	6.75307e+06	733553	42	7	1	772.672
192	0	0	3	0	0	0	0	0	0	0	7	0	0	0	0	0	0	0	0	0	0	1	0	0	0	0	0	0	0	0	0	0	0	0	11	384581	0	384581	0	384581	384581	384581	384581	922033	922033	39	7	1	1060.39
193	0	11	2	5	2	0	2	0	1	4	1	0	4	1	0	0	0	0	0	0	0	1	1	1	0	0	0	0	0	0	0	0	1	2	39	2.41028e+06	20979	2.43126e+06	32305	2.46356e+06	224040	245019	277324	6.58661e+06	567095	42	7	1	1745.92
194	0	2	2	1	0	0	2	0	0	0	0	0	0	1	0	0	0	0	0	0	0	0	0	0	0	0	0	0	0	0	0	0	0	0	8	30553.7	12804	43357.7	0	43357.7	30553.7	43357.7	43357.7	83011.6	83011.6	34	7	1	2815.49
195	0	0	2	4	3	0	1	2	0	0	18	0	1	0	0	0	0	0	0	0	0	1	0	0	0	0	1	0	0	0	0	0	0	0	33	762533	99164.5	861698	390	862088	762533	861698	862088	1.71508e+06	1.71508e+06	44	55	1	475.103
196	0	1	1	0	0	1	1	0	0	0	3	0	0	0	0	0	1	1	0	0	0	0	0	0	0	1	0	0	0	0	0	0	0	0	10	114713	6402	121115	67925.8	189040	114713	121115	189040	246898	246898	44	55	1	875.451
197	0	0	1	4	0	0	0	0	0	0	0	0	0	0	0	0	0	0	0	0	0	0	0	0	0	3	0	0	0	1	2	0	0	0	11	31468.8	0	31468.8	36333.3	67802.1	31468.8	31468.8	67802.1	83244.1	83244.1	44	55	1	3481.65
198	0	0	2	0	0	0	0	0	0	0	0	0	0	0	0	0	0	0	0	0	0	0	0	0	0	2	0	0	0	0	0	0	0	0	4	19000	0	19000	13861.7	32861.7	19000	19000	32861.7	57464.6	57464.6	44	55	1	5230.64
199	0	0	0	0	0	0	0	0	0	0	0	0	0	0	0	0	0	0	0	0	0	0	0	0	0	0	0	0	0	0	0	0	0	0	0	0	0	0	0	0	0	0	0	0	0	30	38	1	7819.71
200	0	0	0	0	0	0	0	0	0	0	1	0	0	1	0	0	0	0	0	0	0	0	0	0	0	0	1	0	0	0	0	0	0	0	3	38116.9	49500	87616.9	0	87616.9	38116.9	87616.9	87616.9	80503.6	80503.6	29	6	1	1253.54
201	0	0	1	3	0	0	0	0	0	0	2	0	0	0	0	0	0	0	0	0	0	0	0	0	0	0	0	0	0	0	0	0	0	0	6	92428.2	0	92428.2	0	92428.2	92428.2	92428.2	92428.2	209120	209120	29	19	1	2095.23
202	0	0	0	0	0	0	0	0	0	0	0	0	0	0	0	0	0	0	0	0	0	0	0	0	0	0	0	0	0	0	0	0	0	0	0	0	0	0	0	0	0	0	0	0	0	30	27	1	363.552
203	0	0	7	10	4	6	0	0	0	0	0	0	3	2	0	1	0	1	0	0	0	0	0	0	0	0	0	0	0	0	0	0	0	0	34	136154	4350	140504	42068.5	182573	136154	140504	182573	367235	367235	31	4	1	687.137
204	0	0	0	0	0	0	0	0	0	0	0	0	0	0	0	0	0	0	0	0	0	0	0	0	0	0	0	0	0	0	0	0	0	0	0	0	0	0	0	0	0	0	0	0	0	30	4	1	189.968
205	0	0	0	0	0	0	0	0	0	0	0	0	0	0	0	0	0	0	0	0	0	0	0	0	0	0	0	0	0	0	0	0	0	0	0	0	0	0	0	0	0	0	0	0	0	29	21	1	952.165
206	0	0	0	0	0	0	0	1	0	0	3	0	0	0	0	0	0	0	0	0	0	1	0	0	0	0	0	0	0	0	0	0	0	0	5	223177	20000	243177	0	243177	223177	243177	243177	556828	556828	30	8	1	1116.84
207	0	0	0	1	0	0	0	0	0	0	0	0	0	0	0	2	0	0	0	0	0	1	0	0	0	1	0	0	0	0	0	0	0	0	5	128992	0	128992	82007.8	211000	128992	128992	211000	361201	361201	30	15	1	6326.66
208	0	0	1	3	0	3	0	1	0	0	10	0	0	0	0	1	0	1	0	0	0	0	0	0	0	0	0	0	3	0	0	0	0	0	23	363185	20000	383185	41785.1	424970	363185	383185	424970	775461	775461	29	21	1	986.649
209	0	0	0	1	0	0	0	0	0	0	2	0	0	0	0	0	0	1	0	0	0	0	0	0	0	0	0	0	0	0	0	0	0	0	4	76893.8	0	76893.8	0	76893.8	76893.8	76893.8	76893.8	161458	161458	31	44	1	1207.37
210	0	0	0	0	0	0	0	0	0	0	0	0	0	0	0	0	0	0	0	0	0	0	0	0	0	0	0	0	0	0	0	0	0	0	0	0	0	0	0	0	0	0	0	0	0	29	11	1	1534.2
211	0	0	0	0	0	0	0	0	0	0	1	0	0	0	0	0	0	0	0	0	0	0	0	0	0	0	0	0	0	0	0	0	0	0	1	33225.8	0	33225.8	0	33225.8	33225.8	33225.8	33225.8	69751.9	69751.9	31	54	1	964.149
212	0	0	1	0	0	0	0	0	0	0	1	0	0	0	0	0	0	0	0	0	0	0	0	0	0	0	0	0	0	0	0	0	0	0	2	42725.8	0	42725.8	0	42725.8	42725.8	42725.8	42725.8	98484.2	98484.2	31	50	1	476.384
213	0	0	1	3	0	0	0	0	0	0	1	0	0	1	0	1	0	0	0	0	0	0	0	0	0	1	0	0	0	0	0	0	0	0	8	64093.5	0	64093.5	44469.3	108563	64093.5	64093.5	108563	150120	150120	30	35	1	5505.72
214	0	0	0	0	0	0	0	0	0	0	0	0	0	0	0	1	0	0	0	0	0	0	0	0	0	0	0	0	0	0	0	0	0	0	1	0	0	0	37538.5	37538.5	0	0	37538.5	0	0	30	37	1	321.451
215	0	0	3	4	0	0	0	0	0	0	8	0	0	0	0	1	0	0	0	0	0	2	0	0	0	0	0	0	0	0	0	0	0	0	18	563275	0	563275	37538.5	600814	563275	563275	600814	1.39387e+06	1.39387e+06	30	39	1	922.668
216	0	0	0	0	0	0	0	0	0	0	0	0	0	0	0	0	0	0	0	0	0	0	0	0	0	0	0	0	0	0	0	0	0	0	0	0	0	0	0	0	0	0	0	0	0	30	52	1	1806.41
217	0	0	0	4	0	0	0	0	0	0	3	0	0	0	0	0	0	0	0	0	0	13	0	0	0	0	0	0	0	0	0	0	0	0	20	1.72715e+06	0	1.72715e+06	0	1.72715e+06	1.72715e+06	1.72715e+06	1.72715e+06	4.78221e+06	4.78221e+06	30	58	1	464.169
218	0	0	0	0	0	0	0	0	0	0	0	0	0	0	0	0	0	0	0	0	0	0	0	0	0	0	0	0	0	0	0	0	0	0	0	0	0	0	0	0	0	0	0	0	0	29	20	1	6703.67
219	0	0	2	3	0	0	0	1	0	0	1	0	0	0	0	0	0	0	0	0	0	0	0	0	0	0	0	0	0	0	0	0	0	0	7	68702.4	20000	88702.4	0	88702.4	68702.4	88702.4	88702.4	168100	168100	29	57	1	2808.36
220	0	0	0	0	0	0	0	0	0	0	0	0	0	0	0	0	0	0	0	0	0	0	0	0	0	0	0	0	0	0	0	0	0	0	0	0	0	0	0	0	0	0	0	0	0	30	4	1	402.201
221	0	0	1	0	0	0	0	6	0	0	0	0	0	0	0	0	0	0	0	0	0	0	0	0	0	0	0	0	0	0	0	0	0	0	7	9500	120000	129500	0	129500	9500	129500	129500	28732.3	28732.3	30	7	1	501.239
222	0	0	0	7	2	0	0	0	0	0	4	0	0	0	0	0	0	0	0	0	0	0	1	0	0	0	0	0	0	0	0	0	0	0	14	177672	2175	179847	0	179847	177672	179847	179847	376439	376439	30	19	1	1431.74
223	0	0	6	0	0	0	2	0	0	0	0	0	0	0	0	0	0	0	0	0	0	0	0	0	0	0	0	0	0	0	0	0	0	0	8	57000	12804	69804	0	69804	57000	69804	69804	172394	172394	30	37	1	473.545
224	0	0	0	2	0	0	0	1	0	0	2	0	0	0	0	1	0	0	0	0	0	0	0	0	0	0	0	0	0	1	0	0	0	0	7	77436	20000	97436	39220	136656	77436	97436	136656	166760	166760	30	52	1	1472.56
225	0	0	2	6	1	0	0	2	0	0	0	0	0	0	0	0	0	0	0	0	0	0	0	0	0	0	0	0	0	0	0	0	0	0	11	51953.2	41087.5	93040.7	0	93040.7	51953.2	93040.7	93040.7	139232	139232	31	54	1	353.781
226	0	0	2	0	0	0	0	0	0	0	0	0	0	0	0	0	0	0	0	0	0	0	0	0	0	0	1	0	0	0	0	0	0	0	3	19000	49500	68500	0	68500	19000	68500	68500	57464.6	57464.6	30	6	1	1365.84
227	0	0	1	6	1	2	0	1	0	0	3	0	0	0	0	0	0	1	0	1	0	0	0	0	0	0	0	0	0	0	0	0	0	0	16	147081	21087.5	168168	7120	175288	147081	168168	175288	328082	328082	30	38	1	6645.75
228	0	0	1	3	0	0	0	0	0	0	13	0	0	0	0	0	0	1	0	0	0	0	0	0	0	0	0	0	0	0	0	0	0	0	18	462862	0	462862	0	462862	462862	462862	462862	984717	984717	30	57	1	2568.59
229	0	0	1	0	1	0	0	0	0	0	0	0	0	0	0	0	0	0	0	0	0	0	0	0	0	0	0	0	0	0	0	0	0	0	2	9500	1087.5	10587.5	0	10587.5	9500	10587.5	10587.5	28732.3	28732.3	31	48	1	1892.26
230	0	0	4	5	0	0	0	1	0	0	1	0	0	0	0	0	0	1	0	0	0	0	0	0	0	0	0	0	0	0	0	0	0	0	12	103637	20000	123637	0	123637	103637	123637	123637	261147	261147	31	50	1	440.306
231	0	0	1	0	0	0	0	0	0	0	3	0	0	0	0	0	0	0	0	0	0	0	0	0	0	0	0	0	0	0	0	0	0	0	4	109177	0	109177	0	109177	109177	109177	109177	237988	237988	30	58	1	790.142
232	0	0	1	0	0	0	0	0	0	0	1	1	0	0	0	0	0	0	0	0	0	1	0	0	0	0	3	0	0	0	0	0	0	0	7	187976	148500	336476	0	336476	187976	336476	336476	479728	479728	29	20	1	6842.12
233	0	0	4	2	0	0	0	1	0	0	3	0	0	1	0	0	0	1	0	0	0	0	0	0	0	0	0	0	0	0	0	0	0	0	12	158503	18109.1	176612	0	176612	158503	176612	176612	370519	370519	29	27	1	76.9472
234	0	0	0	1	0	0	0	0	0	0	18	0	0	0	0	0	0	0	0	0	0	0	0	0	0	0	0	0	0	0	0	0	0	0	19	603557	0	603557	0	603557	603557	603557	603557	1.26916e+06	1.26916e+06	30	43	1	1140.17
235	0	0	1	3	0	0	0	0	0	0	2	2	0	0	0	0	0	2	0	0	0	1	0	0	0	0	0	0	0	1	0	0	0	0	12	269328	0	269328	1681.58	271010	269328	269328	271010	640688	640688	31	44	1	1588.81
236	0	0	6	0	0	0	0	1	0	0	0	0	0	0	0	0	0	1	0	0	0	0	0	0	0	0	0	0	0	0	0	0	0	0	8	61950	20000	81950	0	81950	61950	81950	81950	180720	180720	31	48	1	602.34
237	0	0	1	0	0	0	0	0	0	0	1	0	0	0	0	0	0	0	0	0	0	0	0	0	0	0	0	0	0	0	0	0	0	0	2	42725.8	0	42725.8	0	42725.8	42725.8	42725.8	42725.8	98484.2	98484.2	30	8	1	797.23
238	0	0	3	1	0	0	0	1	0	0	4	0	0	0	0	0	0	0	0	0	0	0	0	0	0	0	0	0	1	0	0	0	0	0	10	166895	20000	186895	855.556	187751	166895	186895	187751	378832	378832	28	11	1	1018.51
239	0	0	0	0	0	0	0	0	0	0	0	0	0	1	0	0	0	0	0	0	0	0	0	0	0	0	0	0	0	0	0	0	0	0	1	4891.05	0	4891.05	0	4891.05	4891.05	4891.05	4891.05	10751.7	10751.7	30	15	1	6693.81
240	0	0	1	3	0	0	0	0	0	0	8	0	0	1	0	0	0	0	0	0	0	0	0	0	0	0	0	0	0	1	0	0	0	0	14	296674	0	296674	1681.58	298356	296674	296674	298356	638383	638383	30	52	1	1550.92
241	0	0	0	1	0	0	0	0	0	0	4	0	0	0	0	0	0	0	0	0	0	0	0	0	0	0	0	0	0	0	0	0	0	0	5	138395	0	138395	0	138395	138395	138395	138395	292636	292636	30	7	1	993.951
242	0	0	0	0	0	0	0	0	0	0	0	0	0	0	0	0	0	0	0	0	0	0	0	0	0	0	0	0	0	0	0	0	0	0	0	0	0	0	0	0	0	0	0	0	0	30	48	1	4458.35
243	0	1	1	2	0	0	1	2	0	0	1	0	0	3	0	0	0	0	0	0	0	1	0	0	0	0	1	0	0	0	0	0	0	0	13	192469	95902	288371	0	288371	192469	288371	288371	506151	506151	30	39	1	1259.12
244	0	0	0	0	0	0	0	0	0	0	2	0	0	0	0	0	0	0	0	0	0	0	0	0	0	0	0	0	0	0	0	0	0	0	2	66451.6	0	66451.6	0	66451.6	66451.6	66451.6	66451.6	139504	139504	30	19	1	1853.16
245	0	0	0	0	0	0	0	0	0	0	14	0	0	0	0	0	0	0	0	0	1	0	0	0	0	0	0	0	0	0	0	0	0	0	15	465161	110000	575161	0	575161	465161	575161	575161	976527	976527	31	55	1	478.654
246	0	0	2	3	0	0	0	1	0	0	4	0	0	0	0	1	0	0	0	0	0	0	0	0	0	0	0	0	0	0	0	0	0	0	11	168380	20000	188380	37538.5	225918	168380	188380	225918	377356	377356	30	43	1	650.109
247	0	0	1	4	0	0	0	0	0	0	28	0	0	35	0	1	0	0	0	0	0	1	0	0	0	0	3	0	0	1	0	0	0	1	75	1.25808e+06	148500	1.40658e+06	39067.1	1.44565e+06	1.25808e+06	1.40658e+06	1.44565e+06	2.76266e+06	2.76266e+06	31	55	1	1479.16
248	0	0	0	0	0	0	2	0	0	0	1	0	0	0	0	0	0	0	0	0	0	0	0	0	0	0	0	0	0	0	0	0	0	0	3	33225.8	12804	46029.8	0	46029.8	33225.8	46029.8	46029.8	69751.9	69751.9	30	7	1	982.071
249	0	0	0	0	0	0	0	0	0	0	2	0	0	0	0	0	0	0	0	0	0	0	0	0	0	0	0	0	0	0	0	0	0	0	2	66451.6	0	66451.6	0	66451.6	66451.6	66451.6	66451.6	139504	139504	30	8	1	1612.39
250	0	0	1	1	0	0	0	0	0	0	3	3	0	0	0	0	0	0	0	0	0	1	0	0	0	0	0	0	0	0	0	0	0	0	9	303420	0	303420	0	303420	303420	303420	303420	700203	700203	30	15	1	6229.4
251	0	0	0	1	1	0	0	0	0	0	1	3	0	1	0	0	0	0	0	0	0	0	0	0	0	0	0	0	0	0	0	0	0	0	7	108859	1087.5	109947	0	109947	108859	109947	109947	195146	195146	29	20	1	7133.33
252	0	0	1	6	0	0	8	0	0	0	5	2	0	1	2	1	0	0	0	0	0	0	0	0	0	2	0	0	0	0	0	0	0	0	28	256973	51216	308189	52969.9	361159	256973	308189	361159	537354	537354	29	21	1	1408.53
253	0	0	1	1	1	0	0	0	0	0	6	0	0	1	0	0	0	0	0	0	0	0	0	0	0	2	0	0	0	0	0	0	0	0	12	219238	1087.5	220326	13861.7	234187	219238	220326	234187	471623	471623	29	27	1	393.183
254	0	1	0	3	2	0	0	0	0	0	1	0	0	0	0	0	0	0	0	0	0	0	0	0	0	0	0	0	0	0	0	0	0	0	7	50287.6	2175	52462.6	0	52462.6	50287.6	52462.6	52462.6	111219	111219	30	48	1	4572.92
255	0	7	1	4	1	0	0	1	0	16	1	0	1	0	0	1	0	1	0	0	0	0	0	0	0	0	0	0	0	0	0	0	0	6	40	83345.5	21087.5	104433	40908.5	145341	83345.5	104433	145341	180280	180280	30	37	1	790.381
256	0	0	7	1	0	1	0	0	0	0	2	0	0	0	0	1	0	2	0	0	0	0	0	0	0	0	0	0	0	1	1	0	0	0	16	148344	0	148344	46709.6	195053	148344	148344	195053	370910	370910	30	43	1	926.515
257	0	0	0	2	1	1	0	1	0	0	1	2	0	1	1	0	1	3	0	0	0	3	0	0	0	8	1	0	0	0	0	0	0	0	26	477951	70587.5	548539	117227	665765	477951	548539	665765	1.2428e+06	1.2428e+06	31	50	1	702.048
258	0	0	0	1	0	0	1	1	0	0	0	0	0	0	0	0	0	0	0	0	0	0	0	0	0	0	0	0	0	0	0	0	0	0	3	5492.2	26402	31894.2	0	31894.2	5492.2	31894.2	31894.2	13628	13628	31	54	1	486.424
259	0	0	1	0	0	0	0	0	0	0	0	0	0	0	0	0	0	0	0	0	0	0	0	1	0	0	0	0	0	0	0	0	0	0	2	9500	0	9500	30000	39500	9500	9500	39500	28732.3	28732.3	30	39	1	530.216
260	0	0	0	0	0	0	0	0	0	0	0	0	0	0	0	0	0	0	0	0	0	0	0	0	0	0	0	0	0	0	0	0	0	0	0	0	0	0	0	0	0	0	0	0	0	30	8	1	259.196
261	0	0	2	0	12	0	0	0	0	0	0	0	0	0	0	1	0	0	0	0	0	0	0	0	0	0	0	0	0	0	0	0	0	1	16	20600.7	13050	33650.7	37538.5	71189.2	20600.7	33650.7	71189.2	59943.3	59943.3	29	6	1	138.013
262	0	0	1	0	0	0	0	0	0	0	0	0	0	0	0	0	0	0	0	0	0	0	0	0	0	0	0	0	0	0	0	0	0	0	1	9500	0	9500	0	9500	9500	9500	9500	28732.3	28732.3	30	7	1	268.353
263	0	0	8	11	3	0	1	0	0	0	3	0	0	0	0	0	0	0	0	1	0	0	0	0	0	0	0	0	0	0	0	0	0	0	27	236092	9664.5	245756	6000	251756	236092	245756	251756	589022	589022	29	38	1	6838.95
264	0	0	1	0	0	0	0	0	0	0	2	0	0	0	0	0	0	0	0	2	0	0	0	0	0	0	0	0	0	0	0	0	0	0	5	75951.6	0	75951.6	12000	87951.6	75951.6	75951.6	87951.6	168236	168236	29	11	1	1407.59
265	0	0	0	1	0	0	0	0	0	0	0	0	0	0	0	0	0	0	0	0	0	0	0	0	0	0	1	0	0	0	0	0	0	0	2	5492.2	49500	54992.2	0	54992.2	5492.2	54992.2	54992.2	13628	13628	30	57	1	159.161
266	0	0	3	0	4	0	0	0	0	0	0	0	0	0	0	0	0	1	0	0	0	0	0	0	0	0	0	0	0	0	0	0	0	0	8	33450	4350	37800	0	37800	33450	37800	37800	94522.9	94522.9	30	19	1	198.595
267	0	0	0	0	0	0	0	0	0	0	0	0	0	0	0	0	0	0	0	0	0	0	0	0	0	0	0	0	0	0	0	0	0	0	0	0	0	0	0	0	0	0	0	0	0	30	36	1	311.783
268	0	0	0	2	0	1	0	0	0	0	1	0	0	0	0	0	0	2	0	0	0	0	0	0	0	0	0	0	0	0	0	0	0	0	6	54110.2	0	54110.2	560	54670.2	54110.2	54110.2	54670.2	113660	113660	30	37	1	158.148
269	0	0	6	2	0	0	0	0	0	0	1	0	0	0	0	0	0	0	0	0	0	0	0	0	0	0	0	0	0	0	0	0	0	0	9	101210	0	101210	0	101210	101210	101210	101210	269402	269402	30	39	1	177.134
270	0	0	0	1	0	0	0	1	0	0	5	0	0	0	0	0	0	0	0	0	0	0	0	0	0	0	0	0	0	0	0	0	0	0	7	171621	20000	191621	0	191621	171621	191621	191621	362387	362387	30	43	1	406.072
271	0	0	0	1	0	0	0	0	0	0	0	0	0	0	0	0	0	0	0	0	0	0	0	0	0	0	0	0	0	0	0	0	0	0	1	5492.2	0	5492.2	0	5492.2	5492.2	5492.2	5492.2	13628	13628	31	44	1	112.674
272	0	0	6	32	0	0	0	3	0	0	0	0	0	0	0	0	0	0	0	0	0	0	0	0	0	0	0	0	0	0	0	0	0	0	41	232751	60000	292751	0	292751	232751	292751	292751	608488	608488	31	50	1	94.565
273	0	0	0	0	0	0	0	0	0	0	0	0	0	0	0	0	0	0	0	0	0	0	0	0	0	0	0	0	0	0	0	0	0	0	0	0	0	0	0	0	0	0	0	0	0	30	52	1	1029.28
274	0	1	2	2	1	1	0	0	0	0	0	0	4	0	0	0	0	1	0	0	0	0	0	0	0	0	0	0	0	0	0	0	0	0	12	35519.6	1087.5	36607.1	2120	38727.1	35519.6	36607.1	38727.1	93630.3	93630.3	31	54	1	211.919
275	0	0	13	12	0	0	0	0	0	0	0	0	0	0	0	0	0	1	0	0	0	0	0	0	0	0	0	0	1	0	0	0	0	0	27	194356	0	194356	855.556	195212	194356	194356	195212	545381	545381	31	55	1	300.641
276	0	0	1	0	0	0	0	0	0	0	3	0	0	0	0	0	0	0	0	0	0	0	0	0	0	0	0	0	0	0	0	0	0	0	4	109177	0	109177	0	109177	109177	109177	109177	237988	237988	30	58	1	285.626
277	0	0	0	0	0	0	0	0	0	0	1	0	0	0	0	1	0	1	0	0	0	0	0	0	0	0	0	0	0	0	0	0	0	0	3	38175.8	0	38175.8	37538.5	75714.3	38175.8	38175.8	75714.3	78078	78078	30	36	1	703.285
278	0	1	14	6	0	5	2	2	0	0	2	0	0	13	0	0	0	1	0	0	0	0	0	0	0	2	0	0	0	4	0	0	0	1	53	303124	52804	355928	23388	379316	303124	355928	379316	774684	774684	30	35	1	6271.33
279	0	0	2	7	0	0	0	1	0	0	7	0	0	2	0	0	0	2	0	0	0	0	0	0	0	0	1	0	0	0	0	0	0	0	22	309708	69500	379208	0	379208	309708	379208	379208	679279	679279	31	55	1	1176.46
280	0	0	1	8	0	1	0	0	0	0	2	0	0	5	1	0	0	0	0	0	0	0	0	0	0	1	0	0	0	0	0	0	0	0	19	144345	0	144345	8275.72	152620	144345	144345	152620	331018	331018	30	57	1	3899.51
281	0	0	0	1	0	0	0	0	0	0	8	0	0	2	0	3	0	0	0	0	0	0	0	0	0	10	0	0	0	0	0	0	0	0	24	281081	0	281081	181924	463005	281081	281081	463005	593147	593147	30	52	1	1165.06
282	0	0	2	0	0	0	0	2	0	0	0	0	0	0	0	1	0	0	0	0	0	0	0	0	0	1	0	0	0	0	0	0	0	0	6	19000	40000	59000	44469.3	103469	19000	59000	103469	57464.6	57464.6	30	6	1	2851.1
283	0	0	1	2	0	2	0	1	0	0	4	1	0	1	0	0	0	0	0	0	0	0	1	0	0	2	0	0	0	0	0	0	0	0	15	186352	20000	206352	14981.7	221334	186352	206352	221334	381455	381455	30	38	1	5462.09
284	0	0	0	3	0	0	0	1	0	0	1	0	0	0	0	0	0	0	0	0	0	2	0	0	0	9	2	0	0	1	0	0	0	0	19	296702	119000	415702	64059.1	479762	296702	415702	479762	805781	805781	31	19	1	4683.38
285	3	1	0	0	0	0	0	0	0	0	0	0	0	1	0	0	0	0	0	0	0	0	0	0	0	0	0	0	0	0	0	0	0	0	5	5476.28	0	5476.28	27900	33376.3	5476.28	5476.28	33376.3	11335.4	11335.4	31	48	1	2583.22
286	1	0	0	4	1	0	0	4	1	0	0	0	0	0	8	0	0	1	0	1	1	2	0	0	0	0	0	0	0	1	0	0	0	1	26	275520	197088	472607	23260.6	495868	275520	472607	495868	760462	760462	31	11	1	1825.22
287	0	0	3	24	0	3	0	1	1	2	2	0	2	1	0	0	1	0	0	0	1	1	0	0	0	0	0	0	0	0	0	0	0	7	49	366361	136000	502361	63267.5	565628	366361	502361	565628	928447	928447	30	11	1	1696.53
288	0	0	1	7	0	0	0	0	0	0	1	1	0	0	2	0	0	0	0	0	0	0	0	0	0	1	0	0	0	0	0	0	0	0	13	102921	0	102921	8500.61	111422	102921	102921	111422	227551	227551	31	44	1	2001.81
289	0	0	1	0	0	0	0	0	0	0	0	0	0	1	1	0	0	1	0	0	0	0	0	0	0	0	0	0	0	0	0	0	0	0	4	19341.1	0	19341.1	784.884	20125.9	19341.1	19341.1	20125.9	47810	47810	28	51	2	1596.72
290	0	0	0	1	0	0	0	0	1	0	0	0	0	1	0	0	0	1	0	0	0	1	0	0	0	0	0	0	0	0	0	0	0	0	5	138833	6000	144833	0	144833	138833	144833	144833	380278	380278	28	51	2	1840.27
291	0	0	0	4	0	0	0	0	0	0	0	0	0	0	0	0	0	0	0	0	0	4	0	0	0	1	0	0	0	0	0	1	0	0	10	707969	0	707969	6930.84	714900	707969	707969	714900	1.79665e+06	1.79665e+06	28	51	2	2195.65
292	0	0	1	3	0	0	0	0	0	0	1	2	0	0	0	0	0	0	0	0	0	0	0	2	0	3	1	0	0	0	0	0	0	0	13	102702	49500	152202	80792.5	232995	102702	152202	232995	206711	206711	28	51	2	4515.95
293	0	0	4	1	0	0	1	0	1	0	0	0	0	0	1	0	0	0	0	0	0	0	0	0	0	1	0	0	0	0	0	0	0	0	9	43492.2	12402	55894.2	7715.72	63609.9	43492.2	55894.2	63609.9	128557	128557	28	51	2	7522.93
294	0	0	0	1	0	0	0	0	0	0	0	0	0	0	0	0	0	0	0	0	0	0	0	1	0	9	0	0	0	0	1	0	0	0	12	5492.2	0	5492.2	99307.1	104799	5492.2	5492.2	104799	13628	13628	27	14	2	2821.99
295	0	0	0	0	0	6	0	0	0	0	0	0	0	0	0	0	0	1	0	0	0	5	0	0	0	0	0	0	0	0	0	0	0	0	12	622450	0	622450	3360	625810	622450	622450	625810	1.74619e+06	1.74619e+06	27	14	2	2959.08
296	0	0	0	0	0	0	0	0	0	0	0	0	0	1	1	0	0	0	0	0	0	0	0	0	0	1	0	0	0	0	0	0	0	0	3	4891.05	0	4891.05	7715.72	12606.8	4891.05	4891.05	12606.8	10751.7	10751.7	27	14	2	3317.43
297	0	0	0	2	0	0	0	0	0	0	0	2	0	1	0	0	0	0	0	0	0	0	0	0	0	1	0	0	0	0	0	0	0	0	6	59375.5	0	59375.5	6930.84	66306.3	59375.5	59375.5	66306.3	105350	105350	27	14	2	5574.08
298	0	0	0	1	1	0	0	0	1	0	0	1	0	1	0	0	0	0	0	0	0	0	0	0	0	0	0	0	0	0	0	0	0	0	5	32133.3	7087.5	39220.8	0	39220.8	32133.3	39220.8	39220.8	58051	58051	28	31	2	1173.06
299	0	0	0	1	0	0	0	0	0	0	0	3	0	0	1	0	0	0	0	0	0	6	0	0	0	0	0	0	0	0	0	0	0	0	11	811742	0	811742	784.884	812527	811742	811742	812527	2.20008e+06	2.20008e+06	28	31	2	1448.7
300	0	0	0	0	0	0	0	0	0	0	0	0	0	0	1	0	0	0	0	0	0	0	0	0	0	0	0	0	0	0	0	1	0	0	2	192000	0	192000	784.884	192785	192000	192000	192785	351852	351852	28	31	2	2111.8
301	0	0	1	4	0	1	0	1	0	0	0	2	0	1	7	0	0	2	0	0	0	2	0	0	0	1	0	0	0	0	0	1	0	1	24	530361	20000	550361	12985	563346	530361	550361	563346	1.22747e+06	1.22747e+06	28	31	2	3543.63
302	0	1	0	1	0	0	0	2	0	0	0	2	0	0	2	0	0	2	0	0	0	0	0	0	0	10	0	0	0	0	0	0	0	0	20	59477.4	40000	99477.4	70878.2	170356	59477.4	99477.4	170356	98206.7	98206.7	28	31	2	6040.28
303	0	0	1	0	0	0	0	0	0	0	0	0	0	0	1	0	0	0	0	0	0	0	0	0	0	0	0	0	0	0	0	0	0	0	2	9500	0	9500	784.884	10284.9	9500	9500	10284.9	28732.3	28732.3	28	56	2	1171.65
304	0	0	0	1	0	0	0	0	0	0	0	0	0	0	0	0	0	0	0	0	0	0	0	0	0	0	1	0	0	0	0	0	0	0	2	5492.2	49500	54992.2	0	54992.2	5492.2	54992.2	54992.2	13628	13628	28	56	2	1454.63
305	0	0	0	2	0	0	0	0	2	0	0	6	0	0	1	0	0	2	0	0	0	1	0	0	0	3	0	0	0	0	0	0	0	0	17	274884	12000	286884	21577.4	308462	274884	286884	308462	593509	593509	28	56	2	6529.11
306	0	0	0	3	0	0	1	0	0	0	0	1	0	1	1	0	0	0	0	0	0	0	0	0	0	1	0	0	0	0	0	0	0	0	8	43117.7	6402	49519.7	7715.72	57235.4	43117.7	49519.7	57235.4	85307	85307	28	2	2	7096.15
307	0	0	0	1	0	0	0	0	0	0	0	1	0	0	1	0	0	0	0	0	0	1	0	0	0	6	1	0	0	0	0	0	0	0	11	150742	49500	200242	42369.9	242612	150742	200242	242612	394872	394872	28	2	2	7173.24
308	0	0	4	0	0	0	0	0	0	0	3	0	0	1	0	0	0	1	0	0	0	4	0	0	0	5	0	0	0	0	0	0	0	0	18	641518	0	641518	34654.2	676173	641518	641518	676173	1.73355e+06	1.73355e+06	28	2	2	7450
309	0	0	0	3	0	0	0	0	0	0	0	1	0	0	4	0	0	1	0	0	0	1	0	0	0	1	0	0	0	0	0	0	0	2	13	169878	0	169878	10070.4	179948	169878	169878	179948	435411	435411	28	2	2	8910.35
310	0	0	1	1	0	0	0	0	0	0	1	0	0	0	0	0	0	0	0	0	0	1	0	0	0	0	0	0	0	0	0	1	0	0	5	363718	0	363718	0	363718	363718	363718	363718	811537	811537	28	18	2	593.451
311	0	0	0	0	0	0	1	0	0	0	1	0	0	0	0	0	0	0	0	0	0	0	0	0	0	0	0	0	0	0	0	0	0	0	2	33225.8	6402	39627.8	0	39627.8	33225.8	39627.8	39627.8	69751.9	69751.9	28	18	2	914.153
312	0	0	1	0	0	0	0	0	0	0	0	0	0	0	0	0	0	1	0	0	0	0	0	0	0	0	0	0	0	0	0	0	0	0	2	14450	0	14450	0	14450	14450	14450	14450	37058.4	37058.4	28	18	2	1534.65
313	0	0	0	0	0	0	0	0	0	0	0	1	0	0	3	1	0	0	0	0	0	0	0	0	0	0	0	0	0	0	0	0	0	0	5	21750	0	21750	39893.1	61643.1	21750	21750	61643.1	33671.4	33671.4	28	18	2	3451.51
314	0	0	2	0	0	0	0	0	0	0	0	2	0	2	26	0	0	4	0	0	0	2	0	0	0	3	0	0	0	0	0	0	0	0	41	339082	0	339082	41199.5	380282	339082	339082	380282	874760	874760	28	1	2	14937.8
315	0	0	0	2	0	0	0	0	0	0	0	1	0	0	4	1	0	0	0	0	0	4	0	0	0	0	0	0	0	0	0	0	0	0	12	526734	0	526734	40678	567412	526734	526734	567412	1.45122e+06	1.45122e+06	28	1	2	15075.3
316	0	0	0	3	0	0	0	0	0	0	0	0	0	0	2	0	0	0	0	0	0	0	0	0	0	0	1	0	0	0	0	0	0	0	6	16476.6	49500	65976.6	1569.77	67546.4	16476.6	65976.6	67546.4	40883.9	40883.9	28	1	2	15340.5
317	0	0	0	0	0	0	0	0	0	0	0	0	0	0	3	1	0	0	0	0	0	0	0	0	0	1	0	0	0	0	0	0	0	0	5	0	0	0	46824	46824	0	0	46824	0	0	4	1	2	16242
318	0	0	0	1	0	0	0	0	0	0	1	2	0	1	13	0	0	4	0	0	0	0	0	0	0	2	0	0	0	0	0	0	0	2	26	110110	0	110110	24065.2	134176	110110	110110	134176	199736	199736	28	1	2	17376.3
319	0	0	2	1	0	0	0	0	0	0	1	1	0	0	0	0	0	0	0	0	0	0	0	0	0	0	0	0	0	0	0	0	0	0	5	79468	0	79468	0	79468	79468	79468	79468	174516	174516	30	30	2	3786.02
320	0	0	0	1	0	0	0	1	0	0	0	1	0	1	3	0	0	0	0	0	0	0	0	0	0	2	1	0	0	0	0	2	0	0	12	416133	69500	485633	16216.3	501850	416133	485633	501850	761756	761756	30	30	2	4049.73
321	0	0	0	4	0	2	0	0	0	0	2	5	0	0	0	0	0	0	0	0	0	10	0	0	0	0	0	0	0	0	0	1	0	0	24	1.62417e+06	0	1.62417e+06	1120	1.62529e+06	1.62417e+06	1.62417e+06	1.62529e+06	4.18995e+06	4.18995e+06	30	30	2	4618.9
322	0	0	0	4	0	1	0	0	0	0	8	1	0	0	14	0	0	0	0	0	0	0	0	0	0	3	0	0	0	0	0	0	0	0	31	309525	0	309525	32340.9	341866	309525	309525	341866	646198	646198	30	30	2	6469.17
323	0	0	3	18	0	0	0	0	0	0	3	1	0	1	3	0	1	0	0	0	0	4	0	0	0	2	0	0	0	0	0	0	0	0	36	747678	0	747678	76651.3	824329	747678	747678	824329	1.97547e+06	1.97547e+06	30	30	2	9355.83
324	0	1	0	4	0	0	0	0	0	0	0	0	0	0	5	0	0	1	0	0	0	0	0	0	0	1	0	0	0	0	1	0	0	0	13	27504	0	27504	17784.8	45288.9	27504	27504	45288.9	63421.6	63421.6	30	13	2	3512.63
325	0	0	0	4	0	0	0	0	0	0	0	0	0	0	6	0	0	1	0	0	0	2	0	0	0	2	0	0	0	0	0	0	0	0	15	273919	0	273919	18571	292490	273919	273919	292490	757983	757983	30	13	2	4183.01
326	0	0	0	3	0	0	0	0	0	0	1	1	0	4	16	0	0	0	0	0	0	0	0	0	0	2	0	1	0	0	0	0	0	0	28	91016.6	8000	99016.6	26419.8	125436	91016.6	99016.6	125436	187314	187314	30	13	2	5762.72
327	0	0	0	3	0	0	0	0	3	0	0	3	0	0	4	2	0	2	0	0	1	4	0	0	0	4	0	0	0	0	0	1	0	0	27	777627	128000	905627	105940	1.01157e+06	777627	905627	1.01157e+06	1.90069e+06	1.90069e+06	30	13	2	8774.93
328	0	0	1	0	0	0	0	0	0	0	0	0	0	0	0	0	0	1	0	0	0	0	0	0	0	0	0	0	0	0	0	0	0	0	2	14450	0	14450	0	14450	14450	14450	14450	37058.4	37058.4	5	26	2	1602.2
329	0	0	1	0	0	0	0	0	0	0	0	0	0	0	0	0	0	1	0	0	0	0	0	0	0	0	0	0	0	0	0	0	0	0	2	14450	0	14450	0	14450	14450	14450	14450	37058.4	37058.4	4	26	2	1877.84
330	0	0	0	3	1	3	0	0	0	0	3	5	0	0	1	0	1	0	0	0	0	1	0	0	0	1	0	0	0	0	0	0	0	0	19	348404	1087.5	349492	69830.7	419322	348404	349492	419322	766069	766069	31	26	2	2537.53
331	0	0	0	2	0	0	0	0	0	0	0	2	0	0	0	0	0	0	0	0	0	1	0	0	0	2	1	0	0	0	0	0	0	0	8	177984	49500	227484	13861.7	241346	177984	227484	241346	442171	442171	31	26	2	4073.78
332	0	0	0	2	0	0	0	0	0	0	0	1	0	0	0	0	0	0	0	0	0	0	0	0	0	2	0	0	0	0	0	3	0	0	8	608734	0	608734	13861.7	622596	608734	608734	622596	1.11648e+06	1.11648e+06	31	26	2	6525.98
333	0	0	0	3	1	0	0	0	0	0	1	0	0	0	0	0	0	0	0	0	0	4	0	0	0	0	0	0	0	0	0	0	0	0	9	543702	1087.5	544790	0	544790	543702	544790	544790	1.50093e+06	1.50093e+06	31	32	2	401.839
334	0	0	0	3	0	0	0	0	0	0	2	0	0	0	1	0	0	2	0	0	0	2	0	0	0	0	0	0	0	0	0	0	0	0	10	339828	0	339828	784.884	340613	339828	339828	340613	892185	892185	31	32	2	725.21
335	0	0	0	0	0	0	0	0	0	0	1	0	0	0	0	0	0	0	0	0	0	0	0	0	0	0	0	0	0	0	0	0	0	0	1	33225.8	0	33225.8	0	33225.8	33225.8	33225.8	33225.8	69751.9	69751.9	31	32	2	1373.43
336	0	0	0	7	0	0	0	0	1	0	2	4	0	0	4	0	0	0	0	0	0	4	0	0	0	0	0	0	0	0	0	0	0	0	22	685897	6000	691897	3139.53	695037	685897	691897	695037	1.75988e+06	1.75988e+06	31	32	2	3183.65
337	0	0	4	2	0	0	0	0	0	0	4	0	0	1	3	0	0	0	0	0	0	1	0	0	0	0	1	0	0	0	0	1	0	0	17	502279	49500	551779	2354.65	554133	502279	551779	554133	1.13137e+06	1.13137e+06	31	32	2	5804.21
338	0	0	0	5	1	0	0	0	0	0	2	1	0	0	5	0	0	0	0	0	0	0	0	0	0	2	1	0	0	0	0	0	0	0	17	115663	50587.5	166250	17786.1	184036	115663	166250	184036	241315	241315	30	28	2	518.415
339	0	0	3	5	0	1	0	0	0	0	0	0	0	1	0	0	0	0	0	0	0	0	0	0	0	0	0	0	0	0	0	0	0	0	10	60852.1	0	60852.1	560	61412.1	60852.1	60852.1	61412.1	165088	165088	30	28	2	736.3
340	0	0	0	0	0	0	0	0	0	0	0	0	0	2	0	0	0	1	0	0	0	0	0	0	0	0	0	0	0	0	0	0	0	0	3	14732.1	0	14732.1	0	14732.1	14732.1	14732.1	14732.1	29829.4	29829.4	30	28	2	1403.07
341	0	0	1	0	0	0	0	0	1	0	0	0	0	2	0	0	0	0	0	0	0	0	0	0	0	0	1	0	0	0	0	1	0	0	6	211282	55500	266782	0	266782	211282	266782	266782	402088	402088	30	28	2	3417.22
342	0	0	0	0	0	0	0	0	0	0	0	0	0	1	1	0	0	0	0	0	0	0	0	0	0	0	0	0	0	0	0	0	0	0	2	4891.05	0	4891.05	784.884	5675.93	4891.05	4891.05	5675.93	10751.7	10751.7	30	28	2	6404.94
343	0	0	1	0	0	0	0	1	1	0	1	0	0	0	3	0	0	0	0	0	0	0	0	0	0	0	0	0	0	0	0	0	0	0	7	42725.8	26000	68725.8	2354.65	71080.5	42725.8	68725.8	71080.5	98484.2	98484.2	30	5	2	2175.96
344	0	0	2	1	0	0	0	0	0	0	0	1	0	0	12	0	0	0	0	0	0	0	0	0	0	0	0	0	0	0	0	0	0	1	17	47842.9	0	47842.9	9418.6	57261.5	47842.9	47842.9	57261.5	107243	107243	30	5	2	2409.18
345	0	0	1	3	0	0	0	0	0	0	1	1	0	0	3	0	0	0	0	0	0	6	0	0	0	0	0	0	0	0	0	0	0	0	15	821952	0	821952	2354.65	824307	821952	821952	824307	2.25848e+06	2.25848e+06	30	5	2	2963.26
346	0	0	0	3	0	0	0	0	0	0	0	1	0	3	0	0	0	0	0	0	0	2	0	0	0	0	1	0	0	0	0	2	0	0	12	683900	49500	733400	0	733400	683900	733400	733400	1.50566e+06	1.50566e+06	30	5	2	4045.2
347	0	0	0	1	0	0	0	0	0	0	1	1	0	0	2	0	0	1	0	0	0	1	0	0	0	0	0	0	0	0	0	1	0	0	8	380918	0	380918	1569.77	382488	380918	380918	382488	824802	824802	30	5	2	6386.67
348	0	0	0	1	0	0	0	0	0	0	1	0	0	0	1	0	0	0	0	0	0	0	0	0	0	0	0	1	0	0	0	0	0	0	4	38718	8000	46718	784.884	47502.9	38718	46718	47502.9	83379.9	83379.9	30	29	2	3149.17
349	0	0	3	11	0	0	0	0	1	0	2	0	0	0	2	0	0	2	0	0	0	1	0	0	0	0	0	0	0	0	0	0	0	0	22	288766	6000	294766	1569.77	296336	288766	294766	296336	739833	739833	30	29	2	3435.48
350	0	0	1	2	0	0	0	0	0	0	0	0	0	0	0	0	0	0	0	0	0	2	0	0	0	0	0	0	0	0	0	0	0	0	5	267484	0	267484	0	267484	267484	267484	267484	751133	751133	30	29	2	3995.37
351	0	0	0	3	0	0	0	0	0	0	2	1	0	1	3	0	0	5	0	0	0	7	0	0	0	0	0	0	0	0	0	0	0	0	22	998819	0	998819	2354.65	1.00117e+06	998819	998819	1.00117e+06	2.69945e+06	2.69945e+06	30	29	2	5926.92
352	0	0	2	7	0	0	0	0	1	0	0	3	0	1	2	0	0	2	0	0	0	0	0	0	0	0	0	0	0	0	0	0	0	0	18	137486	6000	143486	1569.77	145056	137486	143486	145056	281278	281278	30	29	2	8842.46
353	0	0	3	3	0	0	0	0	0	0	0	0	0	0	4	0	0	1	0	0	1	0	0	0	0	0	0	0	0	0	0	0	0	0	12	49926.6	110000	159927	3139.53	163066	49926.6	159927	163066	135407	135407	30	9	2	7297.28
354	0	0	0	2	0	0	0	0	1	0	0	0	0	1	0	0	0	0	0	0	0	2	0	0	0	0	0	0	0	0	0	0	0	0	6	262875	6000	268875	0	268875	262875	268875	268875	733153	733153	30	9	2	7309.22
355	0	0	0	3	0	0	0	0	0	0	0	2	0	1	3	0	0	0	0	0	0	1	0	0	0	1	0	0	0	0	0	0	0	0	11	188368	0	188368	9285.49	197653	188368	188368	197653	466551	466551	30	9	2	7498.52
356	0	0	0	2	0	0	0	0	0	0	1	2	0	0	1	0	0	0	0	0	0	1	0	0	0	0	0	0	0	0	0	0	0	0	7	211210	0	211210	784.884	211995	211210	211210	211995	511923	511923	30	9	2	8055.53
357	0	0	0	3	0	2	0	0	0	0	1	0	0	0	6	0	0	0	0	0	0	1	0	0	0	0	0	0	0	0	0	0	0	0	13	173202	0	173202	5829.3	179032	173202	173202	179032	458208	458208	30	9	2	8950.71
358	0	0	1	1	0	0	0	0	2	0	0	0	0	0	0	0	0	2	0	0	0	0	0	0	0	0	0	0	0	0	0	0	0	0	6	24892.2	12000	36892.2	0	36892.2	24892.2	36892.2	36892.2	59012.4	59012.4	30	12	2	4275.35
359	0	0	2	13	0	1	0	0	0	0	3	0	0	0	1	0	0	1	0	0	0	3	0	0	0	0	0	0	0	0	0	0	0	0	24	565526	0	565526	1344.88	566871	565526	565526	566871	1.49493e+06	1.49493e+06	30	12	2	4564.81
360	0	0	0	2	0	0	0	0	0	0	0	2	0	1	0	0	0	0	0	0	0	3	0	0	0	1	0	0	0	0	0	0	0	0	9	429875	0	429875	6930.84	436806	429875	429875	436806	1.14807e+06	1.14807e+06	30	12	2	5213.15
361	0	0	1	5	0	0	0	0	0	0	0	3	0	1	0	0	0	1	0	0	0	4	0	1	0	0	0	0	0	0	0	0	0	0	16	606052	0	606052	30000	636052	606052	606052	636052	1.60725e+06	1.60725e+06	30	12	2	6729.45
362	0	0	0	1	0	5	0	0	1	0	1	0	1	0	0	1	0	3	0	0	0	2	0	0	0	0	0	0	0	0	0	0	0	1	16	302169	6000	308169	40728.5	348897	302169	308169	348897	805982	805982	30	12	2	8754.67
363	0	0	0	7	0	0	0	0	0	0	0	0	0	1	0	0	0	2	0	0	0	0	0	0	0	0	0	0	0	0	1	0	0	0	11	53236.5	0	53236.5	6929.58	60166.1	53236.5	53236.5	60166.1	122799	122799	30	3	2	916.672
364	0	0	0	1	0	0	0	0	0	0	2	0	0	0	0	0	0	3	0	0	0	0	0	0	0	0	0	0	0	0	0	0	0	0	6	86793.8	0	86793.8	0	86793.8	86793.8	86793.8	86793.8	178110	178110	30	3	2	688.698
365	0	0	0	0	0	0	0	0	0	0	1	0	0	0	0	0	0	0	0	0	0	0	0	0	0	0	0	0	0	0	0	0	0	0	1	33225.8	0	33225.8	0	33225.8	33225.8	33225.8	33225.8	69751.9	69751.9	30	3	2	1010.48
366	0	0	0	5	0	0	0	0	1	0	1	2	0	2	0	0	0	0	0	0	1	2	0	0	0	2	0	0	0	0	0	0	0	0	16	360969	116000	476969	13861.7	490831	360969	476969	490831	921883	921883	30	3	2	2814.32
367	0	0	0	2	0	0	0	0	0	0	0	3	0	0	0	0	0	2	0	0	0	0	0	0	0	0	1	0	0	0	0	0	0	0	8	86134.4	49500	135634	0	135634	86134.4	135634	135634	144922	144922	30	22	2	351.707
368	0	0	0	4	0	0	0	0	0	0	3	0	0	1	0	0	0	0	0	0	0	5	0	0	0	0	0	0	0	0	0	0	0	0	13	744037	0	744037	0	744037	744037	744037	744037	2.01238e+06	2.01238e+06	30	22	2	690.174
369	0	0	0	0	0	0	0	0	0	0	0	0	0	0	0	0	0	0	0	0	0	1	0	0	0	0	0	0	0	0	0	0	0	0	1	123500	0	123500	0	123500	123500	123500	123500	347573	347573	30	22	2	1298.03
370	0	0	0	1	0	0	0	0	0	0	0	0	0	1	0	1	0	7	0	0	0	0	0	0	0	0	0	0	0	0	0	0	0	0	10	45033.3	0	45033.3	37538.5	82571.7	45033.3	45033.3	82571.7	82662.1	82662.1	30	25	2	2040.23
371	0	0	0	1	0	0	0	0	0	0	0	0	0	4	0	2	0	0	0	0	0	1	0	0	0	0	0	0	0	0	0	0	0	0	8	148556	0	148556	75076.9	223633	148556	148556	223633	404207	404207	30	25	2	4053.55
372	0	0	0	1	0	0	0	0	0	0	0	0	0	0	0	0	0	1	0	0	0	0	0	0	0	0	0	0	0	0	0	0	0	0	2	10442.2	0	10442.2	0	10442.2	10442.2	10442.2	10442.2	21954	21954	30	33	2	6029
373	0	0	0	0	0	0	0	0	0	0	0	0	0	0	8	0	0	1	0	0	0	0	0	0	0	2	0	0	0	0	0	0	0	0	11	4950	0	4950	20140.8	25090.8	4950	4950	25090.8	8326.07	8326.07	30	33	2	6315
374	0	0	0	4	0	0	0	0	0	0	0	1	0	1	3	0	0	2	0	0	0	0	0	0	0	1	0	0	0	0	1	0	0	0	13	58509.9	0	58509.9	16215.1	74724.9	58509.9	58509.9	74724.9	115587	115587	30	33	2	7008
375	0	0	0	0	0	1	0	0	0	0	1	0	0	2	3	0	0	3	0	0	0	0	0	0	0	1	0	0	0	0	0	0	0	0	11	57857.9	0	57857.9	9845.49	67703.4	57857.9	57857.9	67703.4	116233	116233	30	33	2	8962
376	0	0	3	14	0	0	0	0	0	0	3	2	0	2	5	0	0	1	0	0	0	1	0	0	0	6	0	0	0	0	0	0	0	0	37	386800	0	386800	45509.5	432310	386800	386800	432310	930989	930989	30	33	2	11896
377	0	0	0	2	0	0	0	0	0	0	1	5	0	3	2	0	0	0	0	0	0	8	0	0	0	0	0	0	0	0	0	0	0	0	21	1.15563e+06	0	1.15563e+06	1569.77	1.1572e+06	1.15563e+06	1.15563e+06	1.1572e+06	3.0782e+06	3.0782e+06	30	23	2	1045.17
378	0	0	0	3	0	0	0	0	0	0	1	0	0	0	0	1	0	3	0	0	0	1	0	0	0	0	0	0	0	0	0	0	0	0	9	188052	0	188052	37538.5	225591	188052	188052	225591	483187	483187	30	23	2	1693.83
379	0	0	0	4	0	0	0	0	0	0	0	1	0	1	1	0	0	0	0	0	0	0	0	0	0	1	0	0	0	0	0	0	0	0	8	48609.9	0	48609.9	7715.72	56325.6	48609.9	48609.9	56325.6	98934.9	98934.9	30	23	2	3656.88
380	0	0	0	4	0	1	0	0	0	0	2	0	0	3	0	0	0	1	0	0	0	0	0	0	0	0	0	0	0	0	0	0	0	2	13	111245	0	111245	560	111805	111245	111245	111805	239554	239554	30	34	2	1829.58
381	0	0	0	3	0	0	0	0	0	0	0	0	0	1	0	0	0	0	0	0	0	0	0	0	0	0	0	0	0	0	0	0	0	0	4	21367.7	0	21367.7	0	21367.7	21367.7	21367.7	21367.7	51635.5	51635.5	30	34	2	1870
382	0	0	0	8	0	0	0	0	1	0	1	1	0	2	4	0	0	2	0	0	0	1	0	0	0	0	1	0	0	0	0	0	0	0	21	242096	55500	297596	3139.53	300735	242096	297596	300735	598175	598175	30	34	2	1874.61
383	0	0	1	0	0	0	0	0	0	0	1	2	0	2	2	0	0	0	0	0	0	1	0	0	0	0	0	0	0	0	0	0	0	0	9	219508	0	219508	1569.77	221078	219508	219508	221078	534903	534903	30	34	2	3039.05
[truncated: 5 more columns]

## Sheet: species_variables
code	type	explanation
Atel.mi	species detections	Atelocynus microtis
Cryp.sp	species detections	Crypyurelus spp
Cuni.pa	species detections	Cuniculus paca
Dasy.sp	species detections	Dasyprocta spp
Dide.ma	species detections	Didelphis marsupialis
Echi.sp	species detections	Echimyidae spp
Eira.ba	species detections	Eira barbara
Leop.pa	species detections	Leopardus pardalis
Leop.wi	species detections	Leopardus wiedii
Lept.sp	species detections	Leptotila spp
Maza.am	species detections	Mazama americana
Maza.ne	species detections	Mazama nemorivaga
Meta.sp	species detections	Metachirus spp
Mitu.Cr	species detections	Mitu Crax spp
Myop.sp	species detections	Myoprocta spp
Myrm.tr	species detections	Myrmecophaga tridactyla
Nasu.na	species detections	Nasua nasua
Nons.Ci	species detections	Nonspecific Cingulata small
Odon.sp	species detections	Odontophorus spp
Orta.gu	species detections	Ortalis guttata
Pant.on	species detections	Panthera onca
Peca.ta	species detections	Pecari tajacu
Pene.ja	species detections	Penelope jacquacu
Prio.ma	species detections	Priodontes maximus
Proc.ca	species detections	Procyon cancrivorus
Psop.sp	species detections	Psophia spp
Puma.co	species detections	Puma concolor
Puma.ya	species detections	Puma yagouaroundi
Sciu.ig	species detections	Sciurus ignitus
Sciu.sp	species detections	Sciurus spadiceus
Tama.te	species detections	Tamandua tetradactyla
Tapi.te	species detections	Tapirus terrestris
Taya.pe	species detections	Tayassu pecari
Tina.sp	species detections	Tinamus spp
all.dets	species detections	summed detections of all species
Bin.hunt	metric of detected group biomass	all species identified in interviews as hunted
Bin.pers	metric of detected group biomass	all species identified in interviews as livestock predators, including felids, mustelids and opossums
Bin.huntpers	metric of detected group biomass	all species either identified as hunted, or livestock predators
Bin.unpers	metric of detected group biomass	all species neither identified as hunted nor as livestock predators
All	metric of detected group biomass	all species
Bin.hunt.nq	metric of detected group biomass	all species identified in interviews as hunted. Without white lipped peccaries
Bin.huntpers.nq	metric of detected group biomass	all species either identified as hunted, or livestock predators. Without white lipped peccaries
All.nq	metric of detected group biomass	all species. Without white lipped peccaries
Hw	metric of detected group biomass	all species, weighted by the region-specific frequency with which they were hunted, derived from interviews
Hw.nq	metric of detected group biomass	all species, weighted by the region-specific frequency with which they were hunted, derived from interviews. Without white lipped peccaries
